# Supplementary material
Source: ML conference proceedings conference paper supplement (https://openaccess.thecvf.com/content/CVPR2025/html/Panagopoulou_ViUniT_Visual_Unit_CVPR_2025_paper.html)
Supplement: Supplementary file 1 [file Panagopoulou_ViUniT_Visual_Unit_CVPR_2025_supplemental.pdf]

# Vunit: Visual Unit Tests for More Robust Visual Programming

## Supplementary Material

### A. Data

The three compositional reasoning datasets used in this work are GQA [3], SugarCREPE [2], and WinoGround [11]. Table 1 shows examples from each dataset, and Table 2 summarizes the dataset statistics. For GQA validation we sample 5 questions from each of the 102 question groups from the `balanced-val` split with a total of 502 examples. For testing, we sample 10 questions per group from the `balanced-train` split yielding 1022 examples. Note that some groups such as `typeVerifyC`, `stateChoose`, and `companyVerify` do not have a sufficient amount of questions, so we sample the whole group. For SugarCREPE, we utilize 788 examples for training by subsampling 10% of the dataset balanced across the 7 question types, excluding our validation split. This validation subset consists of 560 examples and includes both positive and negative image-text pairings from 40 samples for each of the 7 question types. The full Winoground dataset is used, encompassing all possible positive and negative pairings for a total of 1600 examples, with SugarCREPE employed for training.

### B. Unit Test Sampling Pseudocode

For clarity, Algorithm 1 presents the pseudocode for the unit test coverage sampling method described in Section 3.

### C. Program Generation and Execution

In this section, we outline the implementation details for program generation and execution.

#### C.1. Generation Details

For program generation we use in context examples both in of-the-shelf inference, and finetuned model inference. Generation is conducted using **VLLM** with the following generation parameters: `temperature=1.0`, `top_p=0.9`, `top_k=0.0`, `max_new_tokens=320`, and `num_beams=1`. We set the temperature at a high value to ensure diversity in generated programs. For CodeLLaMA we prefix the prompt with `<s>`, and for CodeGemma we enclose it in `<bos><start_of_turn>[...]<end_of_turn>`

#### C.2. Image Patch API

We present the `ImagePatch` API in Code 1 which we adapt the from Khan et al. [4] which is in turn adapted from ViperGPT Surís et al. [10]. We implement object detection using **IDEA-Research/grounding-dino-base** [6] with `text_threshold=box_threshold=0.2`,

| Image                                                                               | Question                                                                                                       | Answer  |
|-------------------------------------------------------------------------------------|----------------------------------------------------------------------------------------------------------------|---------|
| GQA                                                                                 |                                                                                                                |         |
|    | Are there any guys to the right of the brown horse?                                                            | no      |
|    | Which direction is the animal that looks white and brown looking at?                                           | forward |
|    | What type of animal is that fence behind of, an elephant or a giraffe?                                         | giraffe |
| SugarCREPE                                                                          |                                                                                                                |         |
|    | Is there a white pitcher holding flowers in a window sill?                                                     | yes     |
|   | Are a cat and a dog napping together under a blanket on the couch?                                             | no      |
|  | Is a dog sitting in front of a laptop on top of a bed?                                                         | yes     |
| WinoGround                                                                          |                                                                                                                |         |
|  | Verify image matches text="two humans and one wheel"                                                           | yes     |
|  | Verify image matches text="red building with white shutters"                                                   | no      |
|  | Verify image matches text="the person with the white collared shirt waters the plant while the other holds it" | yes     |

Table 1. Dataset Samples

image-text-matching using **openai/clip-vit-large-patch14-336** [8] using 0.8 similarity threshold for detection, and the underlying visual question answering module is **Salesforce/blip2-flan-t5-xxl** [5] loaded in 8-bits using **Bit**

| # Samples | # Images | # Questions | # Answers         | # Question Types | # Questions/Type |
|-----------|----------|-------------|-------------------|------------------|------------------|
| 1022/502  | 1014/487 | 937/474     | GQA<br>176/122    | 105/102          | 10/5             |
| -/1600    | -/800    | -/800       | WinoGround<br>-/2 | -/70             | -/8              |
| 788/560   | 335/260  | 765/557     | SugarCREPE<br>2/2 | 7/7              | 52/80            |

Table 2. Dataset Statistics: Values are shown in {train/test} format. For SugarCREPE and WinoGround, both positive and negative image-text pairings are included. In GQA, question types are divided by the data field group, and in WinoGround by the data field tag. The training data for WinoGround consists of SugarCREPE.

### Algorithm 1 Unit Test Sampling Algorithm

**Require:**  $T = \{t_1, t_2, \dots, t_n\}$ , the set of texts  
**Require:**  $A = \{a_1, a_2, \dots, a_m\}$ , the set of answers  
**Require:**  $f : T \rightarrow A$ , a function mapping each text to an answer  
**Require:**  $E(t)$ , embedding function for text  $t$   
**Require:**  $k$ , number of samples  
**Require:** `use_answers`, a boolean flag  
**Ensure:**  $S$ , a subset of  $T$  of size  $k$

```

1: function SAMPLETEXTS( $T, A, f, E, k, \text{use\_answers}$ )
2:   Initialize  $S \leftarrow \emptyset$ 
3:   if use_answers = True then
4:     for each  $a_i \in A$  do
5:       Select  $t$  from  $T$  such that  $f(t) = a_i$ 
6:        $S \leftarrow S \cup \{t\}$ 
7:        $T \leftarrow T \setminus \{t\}$ 
8:     end for
9:   else
10:    Select a random  $t$  from  $T$ 
11:     $S \leftarrow \{t\}$ 
12:     $T \leftarrow T \setminus \{t\}$ 
13:  end if
14:  while  $|S| < k$  do
15:     $s_{\text{new}} \leftarrow \arg \max_{t \in T} \min_{s \in S} \|E(t) - E(s)\|$ 
16:     $S \leftarrow S \cup \{s_{\text{new}}\}$ 
17:     $T \leftarrow T \setminus \{s_{\text{new}}\}$ 
18:  end while
19:  return  $S$ 
20: end function

```

**sAndBytes** with a maximum batch size of 4 and generation hyperparameters `length_penalty=-1, num_beams=5, max_length=10, min_length=1, do_sample=False, top_p=0.9, repetition_penalty=1.0`, and `temperature=1` for QA and set `length_penalty=1` and `max_length=30` for captioning. All models are served by **HuggingFace**.

### C.3. In-Context Examples

We present the in-context examples used for visual question answering and image-text matching in Codes 2 and 3 respec-

tively. Code execution is handled using multiprocessing with a batch size of 30, and a timeout of 120 seconds, after which a `TimeoutException` is raised if execution exceeds the limit.

## D. Unit Test Generation

### D.1. Implementation Details

To generate the unit test image descriptions and expected answers we prompt **meta-llama/Meta-Llama-3-8B-Instruct**, executed via **VLLM** with the following generation parameters: `temperature=0.7, top_p=0.9, top_k=0.0, max_new_tokens=512`, and `num_beams=1`. We return 3 output sequences, from which we extract the unit tests, deduplicate them, and filter answers longer than five words since they are out of distribution to the task before feeding them to the sampling module.

### D.2. In-Context Examples

We prompt the LLM with the system prompt presented below, as well as in-context examples presented in Codes 6 and 7 for VQA and ITM respectively.

You are a skilled AI assistant specialized in generating test cases for programs that respond to queries about images.

### D.3. Unit Test Candidate Generation

We experiment with two prompting methodologies for the unit test generation: `Query-Only` and `Query+Implementation`. The former only takes into account the user query to generate the unit-tests, while the latter takes into account also each generated program. We prompt the Visual Program Generator in the same way, but instead also include implementation examples and the current implementation as shown in Code 8.

### D.4. Image Generation

To generate the images we use the **diffusers** library, and prompt each of the models with generation hyperparameters `guidance_scale=16.0` and `num_inference_steps=50`. In the case of NSFW image generation, we update the seed by 1 and regenerate an image up to 10 times. Effectively, all unit tests have a corresponding image. We use the following implementations: **CompVis/stable-diffusion-v1-4** for SDv1.4, **longlian/lmd\_plus** for LM Guided Diffusion, and **stabilityai/stable-diffusion-xl-base-1.0** for SDXL3.

#### D.4.1. LM Grounded Diffusion

To generate the bounding boxes and phrases for LM Grounded Diffusion we prompt **meta-llama/Meta-Llama-3-8B-Instruct**, executed via **VLLM** with the

following generation parameters: temperature=1.0, top\_p=0.9, top\_k=0.0, max\_new\_tokens=320, and num\_beams=1. We return 5 candidate sequences to collect multiple candidates since we notice that often the extracted phrases can be empty, leading to failure in image generation. We present the prompt and in-context examples used for this part in Code 9.

## E. Strategies for Visual Unit Test Generation

### E.1. Unit Test Sampler $\sigma$

Figure 1 illustrates the impact of different sampling strategies with varying the number of unit tests and program configurations. Our results indicate that ‘Coverage by Answer then Input’, consistently outperforms other methods. To gain deeper insights, we categorize the questions into three groups: Spatial, Attribute, and Other. For GQA, we classify any question groups containing Attr as Attribute and those mentioning location or position as Spatial. Figure 2 presents the average performance across scenarios with at least five unit tests and three program configurations. Notably, the Coverage by Answer Then Input strategy emerges as the most effective for questions in the Attribute category.

### E.2. Image Generator $M$

Figure 3 shows the impact of various diffusion models across different numbers of unit tests and program configurations. Our analysis reveals that LM-Guided diffusion consistently outperforms other methods, particularly in scenarios with more programs, where the likelihood of finding a suitable program for execution is higher. To gain deeper insights, figure 2 presents the average performance across scenarios with at least three unit tests and two program configurations on the categories introduced in the previous subsection. To provide a deeper understanding, Figure 4 illustrates the average performance across scenarios involving at least three unit tests and two program configurations, focusing on the categories defined earlier. Notably, LM-Guided diffusion proves most effective for questions in the Spatial category, highlighting the advantages of more controllable generation in achieving higher spatial fidelity.

### E.3. Scoring function $h$

Figure 5 highlights the impact of error penalties across varying configurations of unit tests and programs. While their effect becomes negligible in higher-resource configurations with more programs and unit tests, error penalties prove beneficial in lower-resource settings. In these scenarios, they help prioritize the selection of executable programs, thereby improving performance. Notably, runtime error penalties are more impactful for GQA, whereas compilation error penalties play a larger role in WinoGround. This difference likely

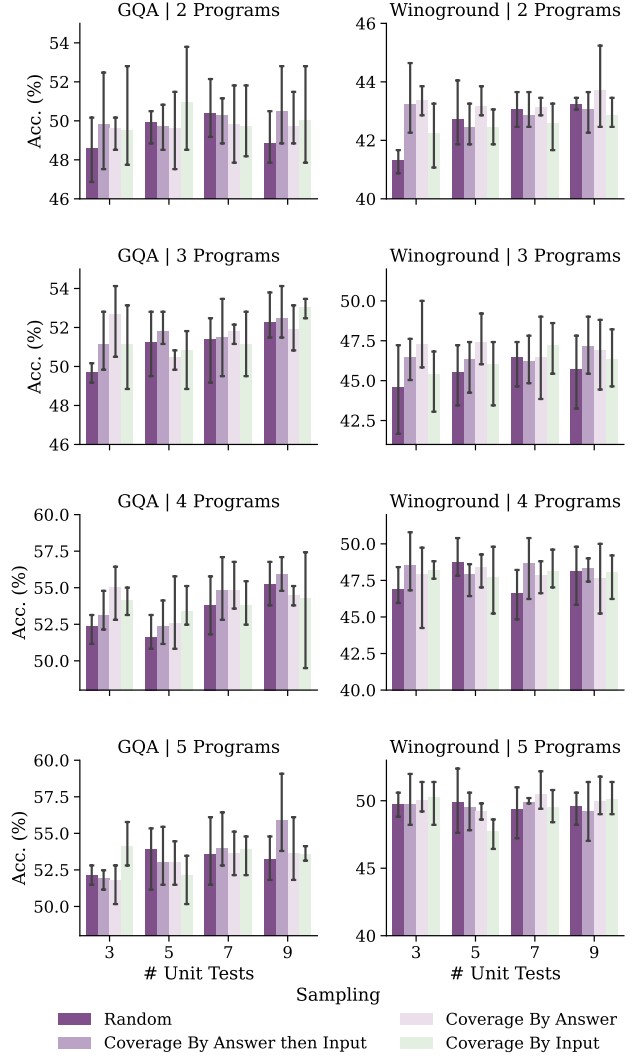

Figure 1. Effect of sampling methods on performance across varying numbers of unit tests and program configurations.

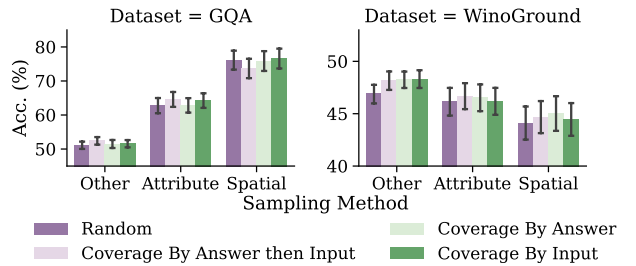

Figure 2. Performance of sampling methods across question categories. Results are averaged over scenarios with at least five unit tests and three program configurations.

stems from the higher complexity of WinoGround programs,

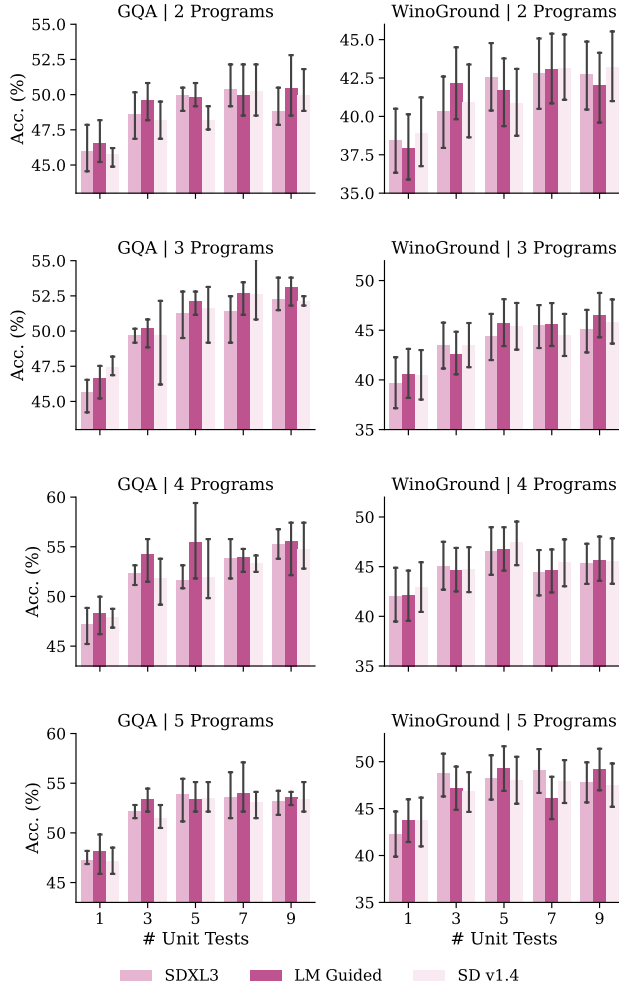

Figure 3. Effect of diffusion model on performance across varying numbers of unit tests and program configurations.

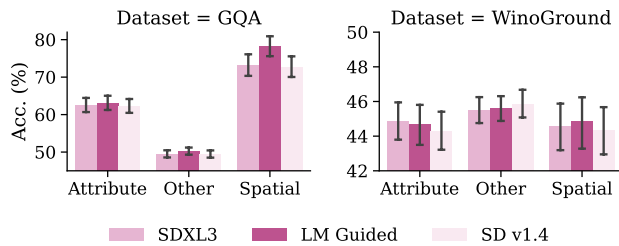

Figure 4. Performance of different diffusion models across question categories. Results are averaged over scenarios with at least three unit tests and two program configurations.

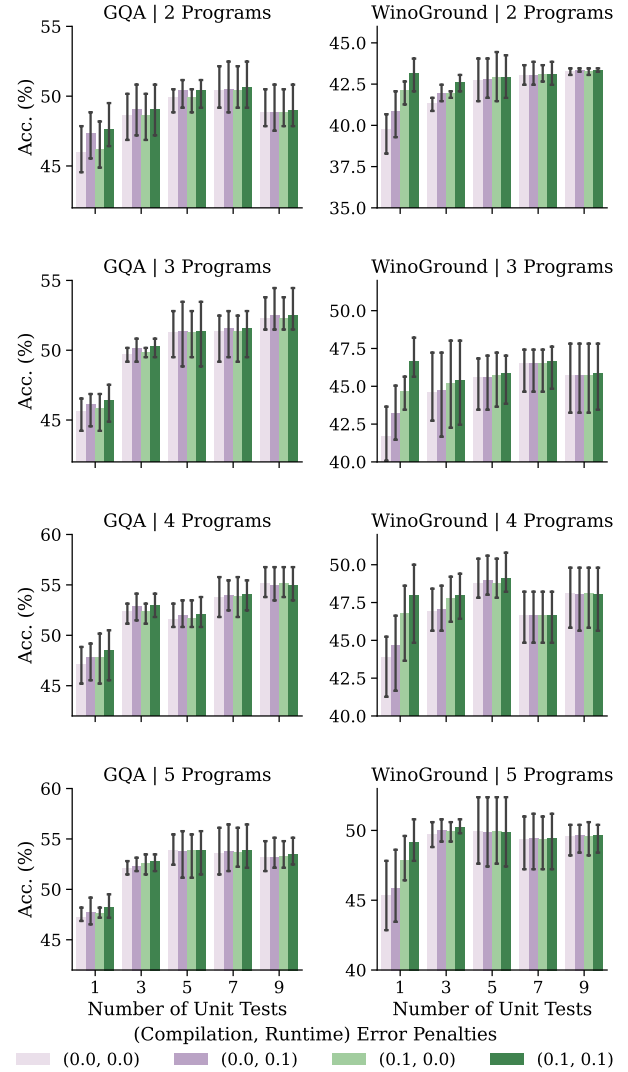

Figure 5. Effect of error penalties on accuracy.

#### E.4. Aggregate Scorer $H$

Figure 6 illustrates the impact of various aggregator functions on accuracy. Among these, mean score aggregation consistently outperforms other methods, particularly in configurations with a higher number of programs. In the case of WinoGround, however, max aggregation also performs competitively, occasionally surpassing mean aggregation. This is likely due to the binary nature of the answers in WinoGround and the increased likelihood of selecting correct for incorrect reasons programs.

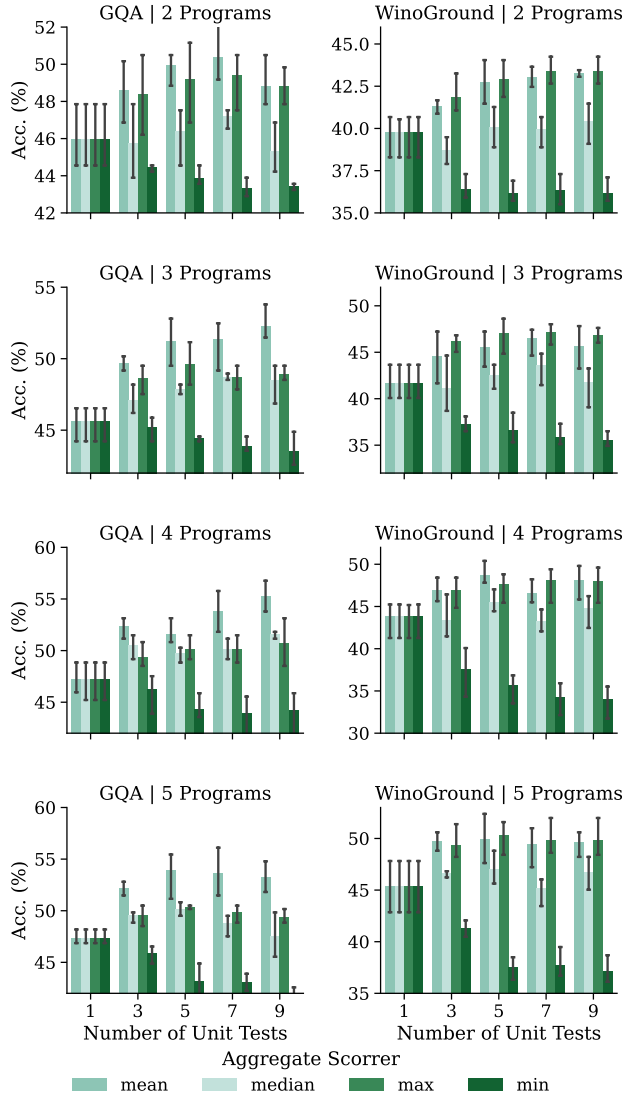

Figure 6. Effect of aggregator function on accuracy.

## F. Visual Unit Test Utilization Methods

### F.1. Best Program Selection

Table 3 shows additional results on best program selection with varying number of programs.

### F.2. Answer Refusal

Figure 7 shows additional statistics on answer refusal, in particular the accuracy of selecting programs that will provide the correct final answer and the programs that succeed on the unit tests at different thresholds.

| LLM                      | # Prog | # UT | VQA                     | Image-Text Matching     |                         |                         |
|--------------------------|--------|------|-------------------------|-------------------------|-------------------------|-------------------------|
|                          |        |      | GQA                     | Winoground              | SugarCREPE              | Avg.                    |
| Base Setup               |        |      |                         |                         |                         |                         |
| gpt-4o-mini              | 1      | 0    | 42.03 $\pm$ 1.21        | 44.98 $\pm$ 0.75        | 38.75 $\pm$ 0.47        | 41.92 $\pm$ 0.81        |
| CodeLlama-7B             | 1      | 0    | 35.99 $\pm$ 2.94        | 38.83 $\pm$ 0.45        | 30.54 $\pm$ 0.99        | 35.12 $\pm$ 1.46        |
| CodeGemma-7B             | 1      | 0    | 41.83 $\pm$ 2.26        | 39.60 $\pm$ 1.38        | 42.56 $\pm$ 1.52        | 41.33 $\pm$ 1.72        |
| Most Common Answer Setup |        |      |                         |                         |                         |                         |
| CodeLlama-7B             | 2      | 0    | 27.76 $\pm$ 0.41        | 36.19 $\pm$ 0.66        | 32.02 $\pm$ 2.25        | 31.99 $\pm$ 1.11        |
| CodeLlama-7B             | 3      | 0    | 35.99 $\pm$ 0.70        | 42.40 $\pm$ 0.85        | 37.26 $\pm$ 2.70        | 38.55 $\pm$ 1.42        |
| CodeLlama-7B             | 4      | 0    | 38.71 $\pm$ 1.61        | 42.12 $\pm$ 0.60        | 39.17 $\pm$ 2.01        | 40.00 $\pm$ 1.41        |
| CodeLlama-7B             | 5      | 0    | 42.50 $\pm$ 1.50        | 45.85 $\pm$ 0.77        | 41.67 $\pm$ 1.79        | 43.34 $\pm$ 1.35        |
| CodeGemma-7B             | 2      | 0    | 31.87 $\pm$ 0.80        | 33.04 $\pm$ 0.67        | 36.37 $\pm$ 1.62        | 33.76 $\pm$ 1.03        |
| CodeGemma-7B             | 3      | 0    | 40.31 $\pm$ 1.00        | 40.50 $\pm$ 1.33        | 44.58 $\pm$ 0.55        | 41.80 $\pm$ 0.96        |
| CodeGemma-7B             | 4      | 0    | 40.44 $\pm$ 0.53        | 43.06 $\pm$ 1.89        | 44.46 $\pm$ 1.17        | 42.66 $\pm$ 1.20        |
| CodeGemma-7B             | 5      | 0    | 43.89 $\pm$ 0.98        | 46.04 $\pm$ 1.48        | 46.67 $\pm$ 1.69        | 45.53 $\pm$ 1.38        |
| ViUnit Setup (Ours)      |        |      |                         |                         |                         |                         |
| CodeLlama-7B             | 2      | 5    | 41.90 $\pm$ 1.74        | 46.65 $\pm$ 1.63        | 40.24 $\pm$ 0.82        | 42.93 $\pm$ 1.40        |
| CodeLlama-7B             | 3      | 5    | 45.68 $\pm$ 0.94        | 48.54 $\pm$ 0.37        | 43.93 $\pm$ 1.09        | 46.05 $\pm$ 0.80        |
| CodeLlama-7B             | 4      | 5    | 49.07 $\pm$ 2.39        | 50.17 $\pm$ 0.54        | 45.65 $\pm$ 1.22        | 48.30 $\pm$ 1.38        |
| CodeLlama-7B             | 5      | 5    | <b>49.27</b> $\pm$ 1.13 | 49.73 $\pm$ 0.73        | 47.02 $\pm$ 1.19        | 48.67 $\pm$ 1.02        |
| CodeGemma-7B             | 2      | 5    | 44.02 $\pm$ 0.72        | 49.27 $\pm$ 0.57        | 46.73 $\pm$ 2.30        | 46.67 $\pm$ 1.20        |
| CodeGemma-7B             | 3      | 5    | 46.08 $\pm$ 0.41        | 51.17 $\pm$ 1.98        | 48.93 $\pm$ 1.86        | 48.73 $\pm$ 1.42        |
| CodeGemma-7B             | 4      | 5    | 47.88 $\pm$ 1.36        | <b>52.25</b> $\pm$ 1.35 | 50.83 $\pm$ 1.32        | 50.32 $\pm$ 1.34        |
| CodeGemma-7B             | 5      | 5    | 48.01 $\pm$ 1.05        | 51.92 $\pm$ 0.90        | <b>51.85</b> $\pm$ 2.16 | <b>50.59</b> $\pm$ 1.37 |

Table 3. Accuracy on Best Program Selection with varying number of programs. **Bold** is best.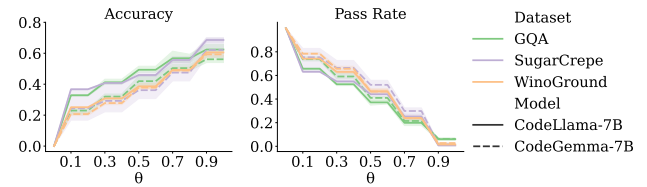

Figure 7. Accuracy and Program Pass Rate for different threshold values for answer refusal.

## F.3. Re-prompting

### F.3.1. Implementation Details

We consider an application of the unit tests to generate different candidate programs if the generated program falls below a threshold. To do so, we maintain the same hyperparameters in the program generator and adapt the prompt to include the outputs of the unit tests as well as use suitable in context examples as shown in Codes 4 and 5 for VQA and ITM respectively.

**Error Reprompting Baseline** We employ the same model and hyperparameters as ViUnit reprompting, but instead adapt the prompt to take into account the error messages instead of the unit tests as shown in Codes 10 and 11 for VQA and ITM respectively.

### F.3.2. Additional Results

Table 4 presents the results of an additional reprompting iteration, highlighting that while ViUnit continues to achieve higher performance overall, there is a slight drop in accuracy compared to the previous iteration. This decline can be attributed to its attempts to refine programs that may already produce correct answers for the wrong reasons. Such corrections can inadvertently cause shifts in the generated answers, leading to decreased accuracy despite the method’s focus on



197 improving program fidelity.

| LLM                                      |       |        |      | VQA              | Image-Text Matching |                  |                  |
|------------------------------------------|-------|--------|------|------------------|---------------------|------------------|------------------|
|                                          | Iter. | # Prog | # UT | GQA              | Winoground          | SugarCREPE       | Avg.             |
| Base Setup (Iteration = 0)               |       |        |      |                  |                     |                  |                  |
| CodeLlama-7B                             | 0     | 1      | 0    | 35.99 $\pm$ 2.94 | 38.83 $\pm$ 0.45    | 30.54 $\pm$ 0.99 | 35.12 $\pm$ 1.46 |
| CodeGemma-7B                             | 0     | 1      | 0    | 41.83 $\pm$ 2.26 | 39.60 $\pm$ 1.38    | 42.56 $\pm$ 1.52 | 41.33 $\pm$ 1.72 |
| Error Reprompting                        |       |        |      |                  |                     |                  |                  |
| CodeLlama-7B                             | 1     | 1      | 0    | 37.92 $\pm$ 2.68 | 42.46 $\pm$ 0.57    | 33.21 $\pm$ 0.64 | 37.86 $\pm$ 1.30 |
| CodeLlama-7B                             | 2     | 1      | 0    | 38.78 $\pm$ 2.22 | 44.58 $\pm$ 0.44    | 37.08 $\pm$ 1.08 | 40.15 $\pm$ 1.25 |
| CodeGemma-7B                             | 1     | 1      | 0    | 42.63 $\pm$ 2.42 | 42.42 $\pm$ 1.91    | 44.52 $\pm$ 1.05 | 42.63 $\pm$ 2.42 |
| CodeGemma-7B                             | 2     | 1      | 0    | 42.90 $\pm$ 2.65 | 43.08 $\pm$ 1.73    | 45.30 $\pm$ 0.92 | 42.90 $\pm$ 2.65 |
| ViUniT Reprompting $\theta = 0.7$ (Ours) |       |        |      |                  |                     |                  |                  |
| CodeLlama-7B                             | 1     | 1      | 5    | 46.68 $\pm$ 2.52 | 51.85 $\pm$ 0.40    | 47.68 $\pm$ 2.17 | 48.74 $\pm$ 1.69 |
| CodeLlama-7B                             | 2     | 1      | 5    | 46.95 $\pm$ 1.33 | 52.04 $\pm$ 0.83    | 48.04 $\pm$ 1.64 | 49.01 $\pm$ 1.26 |
| CodeGemma-7B                             | 1     | 1      | 5    | 45.75 $\pm$ 0.30 | 48.19 $\pm$ 2.28    | 48.21 $\pm$ 1.12 | 47.38 $\pm$ 1.23 |
| CodeGemma-7B                             | 2     | 1      | 5    | 44.42 $\pm$ 1.00 | 49.25 $\pm$ 2.66    | 48.81 $\pm$ 1.19 | 47.49 $\pm$ 1.62 |

Table 4. Accuracy of different re-prompting methods with an additional iteration. **Bold** is best.

## 198 F.4. Reward Design for Reinforcement Learning

### 199 F.4.1. Implementation Details

200 Table 5 contains additional hyperparameters used for training.  
 201 Each RL epoch requires about 30 minutes with correctness  
 202 reward, and 90 minutes with ViUniT reward since it requires  
 execution of unit tests.

| Parameter                  | Value                          |
|----------------------------|--------------------------------|
| warmup_ratio               | 0.1                            |
| max_grad_norm              | 0.3                            |
| lr_scheduler_type          | linear                         |
| learning_rate              | 2e-4                           |
| lora_config.r              | 16                             |
| lora_config.lora_alpha     | 32                             |
| lora_config.lora_dropout   | 0.05                           |
| lora_config.bias           | none                           |
| lora_config.target_modules | k_proj v_proj<br>q_proj o_proj |

Table 5. RL training hyperparameters.

203

### 204 F.4.2. Additional Analysis

205 Table 6 highlights the reduced error rates—measured as  
 206 the number of programs leading to exceptions—achieved  
 207 using the ViUniT reward. Additionally, Table 7 presents  
 208 the results of cross-task and cross-dataset generalization  
 209 on policies trained with GQA, following the approach of  
 210 [4]. For VQAv2 [1], we sample 10 questions for each of  
 211 the 50 most common answers from the validation split of  
 212 the compositional subset curated by [9], similar to [4]. For  
 213 OKVQA [7], we sample 10 questions per question type,  
 214 resulting in a total of 110 questions. The results indicate that  
 215 while both reward types demonstrate strong generalization  
 216 across tasks and datasets, the ViUniT reward consistently  
 217 delivers superior performance.

|                                   |        | VQA  |                  | Image-Text Matching |                  |                  |
|-----------------------------------|--------|------|------------------|---------------------|------------------|------------------|
| LLM                               | # Prog | # UT | GQA              | Winoground          | SugarCREPE       | Avg.             |
| Supervised Correctness Reward     |        |      |                  |                     |                  |                  |
| CodeLlama-7B                      | 1      | 0    | 15.14 $\pm$ 7.74 | 8.21 $\pm$ 1.72     | 20.06 $\pm$ 3.62 | 14.47 $\pm$ 4.36 |
| CodeGemma-7B                      | 1      | 0    | 9.10 $\pm$ 9.35  | 13.25 $\pm$ 6.30    | 12.86 $\pm$ 4.41 | 11.73 $\pm$ 6.69 |
| Unsupervised ViUniT Reward (Ours) |        |      |                  |                     |                  |                  |
| CodeLlama-7B                      | 1      | 0    | 9.56 $\pm$ 2.13  | 10.31 $\pm$ 1.55    | 15.42 $\pm$ 3.03 | 11.76 $\pm$ 2.24 |
| CodeGemma-7B                      | 1      | 0    | 1.99 $\pm$ 0.91  | 5.81 $\pm$ 0.49     | 6.25 $\pm$ 1.02  | 4.68 $\pm$ 0.80  |

Table 6. Comparison of *Error Rates* in models trained with supervised correctness rewards versus unsupervised unit-test-based rewards. Lower is better. **Bold** is best.

| LLM                               | X-Dataset Generalization |      |                  |                  | X-Task Generalization |                   |
|-----------------------------------|--------------------------|------|------------------|------------------|-----------------------|-------------------|
|                                   | # Prog                   | # UT | VQAv2            | OK-VQA           | Winoground            | SugarCREPE        |
| Base Setup                        |                          |      |                  |                  |                       |                   |
| CodeLlama-7B                      | 1                        | 0    | 25.67 $\pm$ 2.20 | 16.09 $\pm$ 2.02 | 30.54 $\pm$ 0.99      | 35.12 $\pm$ 1.46  |
| CodeGemma-7B                      | 1                        | 0    | 36.40 $\pm$ 1.44 | 27.58 $\pm$ 2.48 | 42.56 $\pm$ 1.52      | 41.33 $\pm$ 1.72  |
| Supervised Correctness Reward     |                          |      |                  |                  |                       |                   |
| CodeLlama-7B                      | 1                        | 0    | 34.33 $\pm$ 7.82 | 24.12 $\pm$ 5.98 | 41.02 $\pm$ 3.05      | 37.14 $\pm$ 6.48  |
| CodeGemma-7B                      | 1                        | 0    | 42.47 $\pm$ 6.03 | 28.12 $\pm$ 6.20 | 47.98 $\pm$ 4.98      | 39.94 $\pm$ 11.58 |
| Unsupervised ViUniT Reward (Ours) |                          |      |                  |                  |                       |                   |
| CodeLlama-7B                      | 1                        | 0    | 35.87 $\pm$ 2.31 | 25.64 $\pm$ 0.91 | 43.63 $\pm$ 2.89      | 44.35 $\pm$ 3.18  |
| CodeGemma-7B                      | 1                        | 0    | 44.00 $\pm$ 4.20 | 36.85 $\pm$ 3.48 | 51.78 $\pm$ 0.41      | 49.23 $\pm$ 2.54  |

Table 7. GQA policy generalization across tasks and datasets

## 218 G. End-to-End Fallback Methods

### 219 G.1. Implementation Details

#### 220 G.1.1. VQA

221 For VQA we revert to ask the query directly to  
 222 [Salesforce/blip2-flan-t5-xxl](#) [5] loaded in 8-bits using [Bit-](#)  
 223 [sAndBytes](#) with a maximum batch size of 4 and generation  
 224 hyperparameters `length_penalty=-1`, `num_beams=5`,  
 225 `max_length=10`, `min_length=1`, `do_sample=False`,  
 226 `top_p=0.9`, `repetition_penalty=1.0`, and  
 227 `temperature=1`.

#### 228 G.1.2. Image-Text-Matching

229 For image-text-matching we revert to [openai/clip-vit-large-](#)  
 230 [patch14-336](#) [8] using 0.8 similarity threshold for positive  
 231 match, and negative otherwise.

### 232 G.2. Results with Fallback Method on Exception

233 In this work, we report results without employing a fallback  
 234 method on exceptions, treating such cases as failures to  
 235 better assess the quality of programs generated by different  
 236 methods. However, it is common in the literature to report  
 237 accuracy with a fallback method applied on exceptions. In  
 238 Table 8 we present the best program selection results using  
 239 this fallback approach on error.

## 240 H. Human Evaluation

241 This section presents details on the human evaluations on  
 242 the quality of unit tests, and program correctness. We used  
 243 [Google-Forms](#) to conduct the evaluations.

### 244 H.1. Unit Test Evaluation

245 To assess the quality of unit tests we randomly sample 20  
 246 examples from each of the three datasets, each correspond-

| LLM                      |        |      | VQA                     | Image-Text Matching     |                         |                         |
|--------------------------|--------|------|-------------------------|-------------------------|-------------------------|-------------------------|
|                          | # Prog | # UT | GQA                     | Winoground              | SugarCREPE              | Avg.                    |
| Base Setup               |        |      |                         |                         |                         |                         |
| gpt-4o-mini†             | 1      | 0    | 43.76 $\pm$ 1.72        | <b>51.94</b> $\pm$ 0.56 | 49.46 $\pm$ 1.25        | 48.39 $\pm$ 1.17        |
| CodeLlama-7B†            | 1      | 0    | 44.75 $\pm$ 2.01        | 51.65 $\pm$ 0.09        | 48.57 $\pm$ 0.82        | 48.32 $\pm$ 1.31        |
| CodeGemma-7B†            | 1      | 0    | 44.82 $\pm$ 2.30        | 47.23 $\pm$ 2.26        | 50.18 $\pm$ 0.71        | 47.41 $\pm$ 1.76        |
| Most Common Answer Setup |        |      |                         |                         |                         |                         |
| CodeLlama-7B†            | 5      | 0    | 49.07 $\pm$ 2.79        | 51.29 $\pm$ 0.87        | 46.79 $\pm$ 1.29        | 49.05 $\pm$ 1.65        |
| CodeGemma-7B†            | 5      | 0    | 46.61 $\pm$ 1.24        | 49.10 $\pm$ 1.32        | 49.17 $\pm$ 1.52        | 48.29 $\pm$ 1.36        |
| ViUniT Setup (Ours)      |        |      |                         |                         |                         |                         |
| CodeLlama-7B†            | 5      | 5    | <b>49.27</b> $\pm$ 1.33 | 49.73 $\pm$ 0.73        | 47.02 $\pm$ 1.19        | <b>48.67</b> $\pm$ 1.08 |
| CodeGemma-7B†            | 5      | 5    | <b>48.14</b> $\pm$ 1.02 | 51.92 $\pm$ 0.90        | <b>51.85</b> $\pm$ 2.16 | <b>50.63</b> $\pm$ 1.36 |

Table 8. Accuracy on Best Program Selection using fallback method on exception (indicated by †). **Bold** is best.

ing to 5 unit tests, resulting in a total of 300 unit tests for evaluation. The unit tests were judged by three independent annotators, instructed with `Is the answer correct given the image?, where answer was populated with the unit test expected answer, expecting binary yes/no answers.` Table 9 breaks down the results showing that on average 75% of unit tests are correct. Then the annotators optionally annotated the reason of failure by selecting from “Missing Object”, “Spatial Error”, “Incomplete object”, “Color Mismatch”, or “Other”. Figure 8 shows the break down by error type, highlighting “Missing Object” as the most common source of error.

| GQA   |          | WinoGround |          | SugarCREPE |          | Avg.  |          |
|-------|----------|------------|----------|------------|----------|-------|----------|
| Acc.  | $\kappa$ | Acc.       | $\kappa$ | Acc.       | $\kappa$ | Acc.  | $\kappa$ |
| 68.00 | 0.39     | 75.00      | 0.70     | 82.00      | 0.67     | 75.00 | 0.58     |

Table 9. Human Evaluation of Unit Test Quality. Accuracy corresponds to how many unit tests from the total were accurate and  $\kappa$  is the mean Kohen Kappa across annotators.

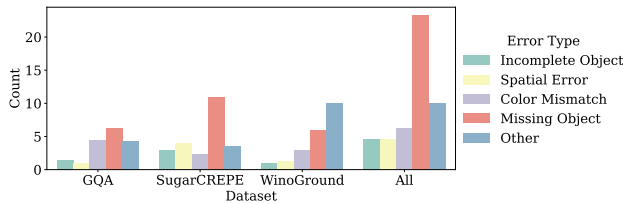

Figure 8. Human Evaluation of Unit Test Quality. Bars show the average number of times annotators selected a source of error.

## H.2. Program Correctness Evaluation

To assess the improvements on program quality by applying ViUniT we conduct a human evaluation to rate GQA programs generated by the Base Setup and the programs selected from 5 candidate programs and 5 unit tests. Two annotators with 3+ years of Python experience graded programs using the following grading scheme: “Correct: The code accurately and fully answers the query.” (0), “Partially Correct: The code answers the query but has some issues.”

(1), “Incorrect: The code does not answer the query correctly.” (2), and “Irrelevant: The code is unrelated to the query.” (3). In addition, they were optionally asked to select the source of error from “Missing Condition”, “Incorrect Logic”, “Irrelevant to the query”, “Wrong Conditions”, “Missing Checks (e.g. could get list index out of range)”, “Performance Issues”, “Other”. Table 10 shows the breakdown of program correctness improvements using ViUniT and Figure 9 shows the error types identified in each method. ViUniT has “Missing Checks” as the most common error type, which mostly involves cases of not checking array length before accessing indices, typically still leading to correct solutions with reasonable programs, whereas the main culprit for program incorrectness in the base setup is “Incorrect Logic”. This pattern of error redistribution occurs because unit tests disqualify programs likely correct for the wrong reasons. Irrelevant programs rarely pass multiple tests, while errors like wrong or missing conditions are less likely but possible. Missing checks (e.g., checking array length prior to access) often pass due to well-formatted inputs, which explains their persistence even post unit-testing.

|                             | Base Setup | ViUniT Setup (Ours) |
|-----------------------------|------------|---------------------|
| Fully Correct ( $\leq 1$ )  | 77%        | <b>86%</b>          |
| Partially Correct ( $< 2$ ) | 86%        | <b>95%</b>          |
| Incorrect ( $\geq 2$ )      | 14%        | <b>5%</b>           |
| Irrelevant ( $> 2$ )        | 4%         | <b>0%</b>           |
| $\kappa$                    | 0.24       | 0.30                |
| $\kappa_{bin}$              | 0.59       | 0.40                |

Table 10. Human Evaluation of Program Correctness. **Bold** is best.

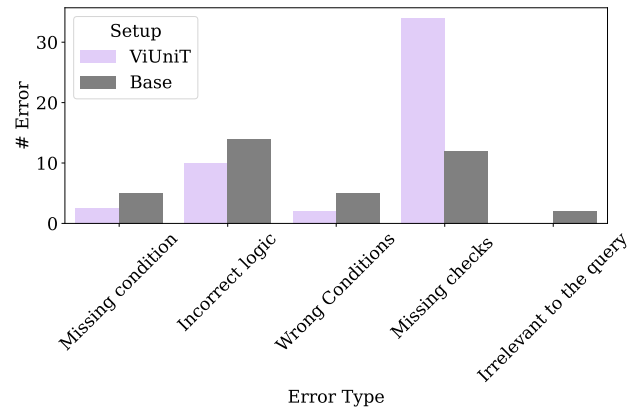

Figure 9. Human Evaluation of Program Quality.

## I. Limitations and Social Ethics Impact

### I.1. Limitations

While ViUniT provides significant advancements in the logical correctness and robustness of visual programs, our frame-

work has several limitations that present opportunities for future enhancement. First, although ViUniT improves program selection and execution by leveraging unit tests, it does not fully eliminate the issue of programs being correct for the wrong reasons, as shown by the human evaluation in Table 10. Our approach does not provide a formal guarantee of logical correctness, as it relies on automatically generated tests to evaluate candidate programs. Addressing this challenge opens avenues for integrating formal verification methods and more sophisticated testing strategies to further enhance program correctness. Second, while we optimize for maximizing input and output coverage during unit test generation, it is possible that the generated tests do not fully capture the space of edge cases or subtle logical errors in complex programs. This limitation highlights the potential for future work to develop more comprehensive coverage metrics and testing methodologies, possibly incorporating code-line execution coverage or other verifiable metrics. Third, the improved accuracy and robustness achieved by ViUniT, as seen in Table 1, come with an increase in computational effort. Generating candidate programs, sampling unit tests, and executing them on generated images introduce additional overhead. This trade-off between accuracy and efficiency presents an exciting challenge for future research to optimize the framework for real-time or resource-constrained applications, possibly through algorithmic improvements or efficient execution strategies. Additionally, enhancing the explainability of program failures remains an area for further development. Providing clear and interpretable feedback when a program is rejected or not selected due to poor performance on unit tests can improve user trust and facilitate debugging. Future work could focus on combining unit test outputs to offer detailed explanations of program failures. Finally, while ViUniT has demonstrated effectiveness on VQA and ITM tasks, exploring its applicability to other domains or tasks involving different modalities or reasoning paradigms presents an opportunity to extend its impact. Adapting the framework to diverse domains can unlock new possibilities and broaden its utility. Despite these limitations, the advancements introduced by ViUniT lay a strong foundation for future innovations in visual programming. By addressing these challenges, we can further enhance the robustness, efficiency, and applicability of the framework.

## I.2. Social Ethics Impact

ViUniT enhances the robustness and correctness of visual programming, with applications in critical domains like autonomous driving, healthcare, and education. By reducing instances where programs are correct for the wrong reasons, it helps build more trustworthy AI systems. However, ethical considerations are crucial for its responsible deployment: First, ViUniT relies on pre-trained models, which may propagate biases (e.g., gender, racial, or cultural). Future work

should focus on integrating bias detection and correction into unit test generation to promote fairness. Second, computational demands may limit access for resource-constrained organizations. Advancing efficiency and optimization can broaden accessibility and foster inclusivity. Third, increased computational needs may raise energy consumption. Optimizing for energy efficiency and using renewable energy can reduce the environmental impact, while improved AI reliability could deliver long-term sustainability benefits. Finally, in sensitive domains such as healthcare or legal decision-making, while ViUniT has the potential to enhance the correctness of visual programs, it is crucial to carefully communicate the framework’s limitations and ensure rigorous validation. By proactively addressing ethical challenges and focusing on responsible development, we can maximize the positive societal impact of ViUniT, paving the way for more reliable, fair, and trustworthy AI systems.

## J. Qualitative Examples

We present two program selection examples in Figures 10 and 11. While all programs may pass some unit tests, those that pass a greater number of tests tend to more effectively capture the intent of the question. In Figure 11, the selected program does not pass all unit tests—some of which cover edge-cases not handled by the program. Nevertheless, it is chosen because it sufficiently addresses the core intent of the user’s query.



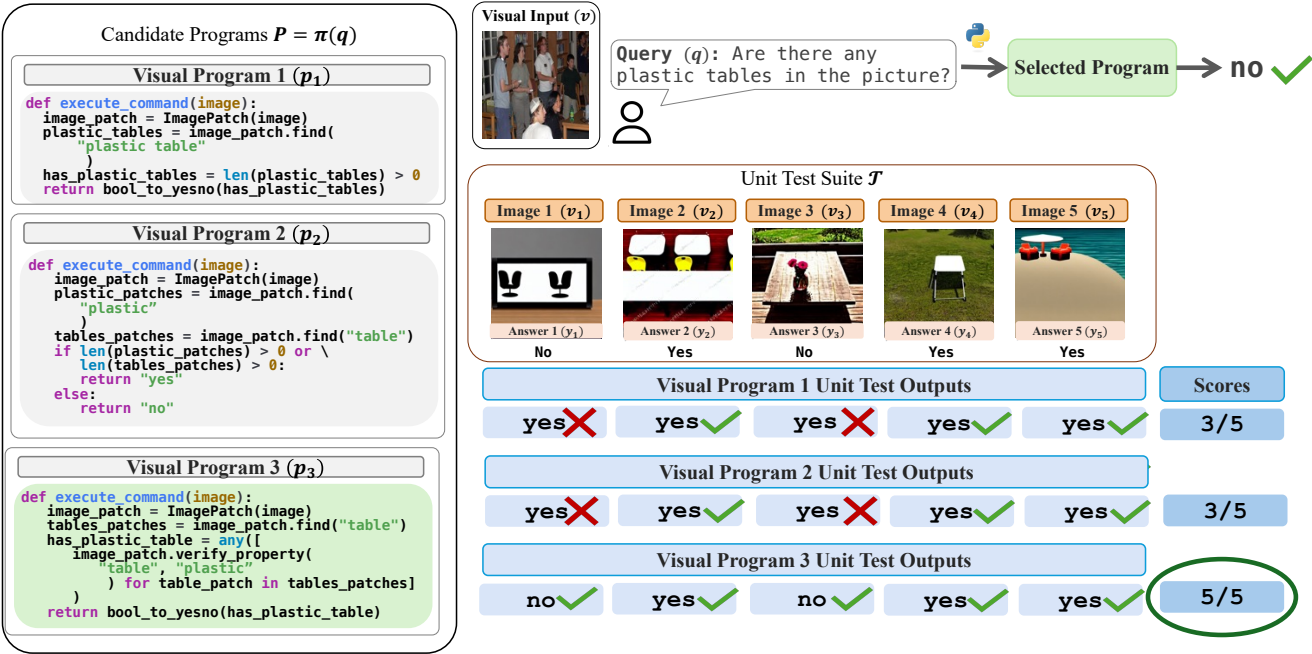

Figure 10. Program Selection Example

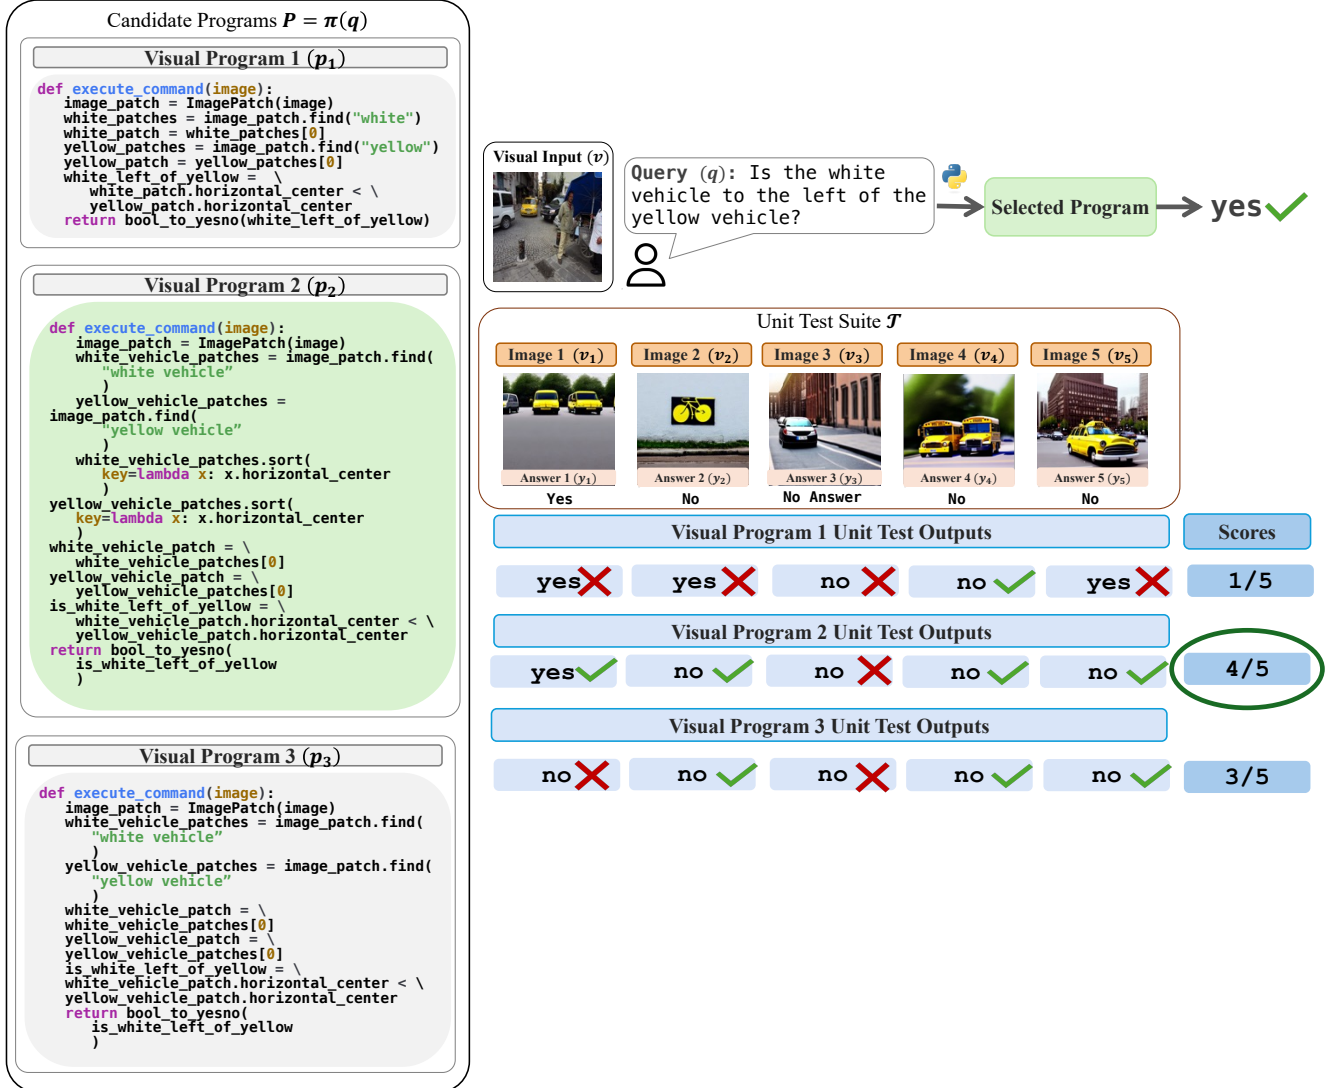

Figure 11. Program Selection Example

## Listing 1. API Prompt

```

import math
class ImagePatch:
    pass

    def __init__(
        self, image, left=None, lower=None, right=None, upper=None, category=None
    ):
        """Initializes an ImagePatch object by cropping the image at the given
        coordinates and stores the coordinates as attributes. If no coordinates are
        provided, the image is left unmodified, and the coordinates are set to the
        dimensions of the image.
        Parameters
        -----
        image : array_like
            An array-like of the original image.
        left, lower, right, upper : int
            An int describing the position of the (left/lower/right/upper) border of the
            crop's bounding box in the original image.
        category : str
            A string describing the name of the object in the image."""

        # Rectangles are represented as 4-tuples, (x1, y1, x2, y2),
        # with the upper left corner given first. The coordinate
        # system is assumed to have its origin in the upper left corner, so
        # upper must be less than lower and left must be less than right.

        self.left = left if left is not None else 0
        self.lower = lower if lower is not None else image.height
        self.right = right if right is not None else image.width
        self.upper = upper if upper is not None else 0
        self.cropped_image = image[:, image.shape[1]-upper:image.shape[1]-lower, left:right]
        self.horizontal_center = (self.left + self.right) / 2
        self.vertical_center = (self.upper + self.lower) / 2
        self.category = category

    def from_bounding_box(cls, image, bounding_box):
        """Initializes an ImagePatch object by cropping the image at the given
        coordinates and stores the coordinates as attributes.
        Parameters
        -----
        image : array_like

```

371  
372  
373  
374  
375  
376  
377  
378  
379  
380  
381  
382  
383  
384  
385  
386  
387  
388  
389  
390  
391  
392  
393  
394  
395  
396  
397  
398  
399  
400  
401  
402  
403  
404  
405  
406  
407  
408  
409  
410  
411  
412

```

    An array-like of the original image.
    bounding_box : dict
    A dictionary like {"box": [left, lower, right, upper], "category": str}."""
    pass

@property
def area(self):
    """
    Returns the area of the bounding box.

    Examples
    -----
    >>> # What color is the largest foo?
    >>> def execute_command(image) -> str:
    >>>     image_patch = ImagePatch(image)
    >>>     foo_patches = image_patch.find("foo")
    >>>     foo_patches.sort(key=lambda x: x.area)
    >>>     largest_foo_patch = foo_patches[-1]
    >>>     return largest_foo_patch.simple_query("What is the color?")
    """
    pass

def find(self, object_name):
    """Returns a list of ImagePatch objects matching object_name contained in the
    crop if any are found.
    Otherwise, returns an empty list.
    Parameters
    -----
    object_name : str
        the name of the object to be found

    Returns
    -----
    List[ImagePatch]
        a list of ImagePatch objects matching object_name contained in the crop

    Examples
    -----
    >>> # return the foo
    >>> def execute_command(image) -> List[ImagePatch]:
    >>>     image_patch = ImagePatch(image)
    >>>     foo_patches = image_patch.find("foo")
    >>>     return foo_patches
    """
    pass

def exists(self, object_name):
    """Returns True if the object specified by object_name is found in the image,
    and False otherwise.
    Parameters
    -----
    object_name : str
        A string describing the name of the object to be found in the image.

    Examples
    -----
    >>> # Are there both foos and garply bars in the photo?
    >>> def execute_command(image)->str:
    >>>     image_patch = ImagePatch(image)
    >>>     is_foo = image_patch.exists("foo")
    >>>     is_garply_bar = image_patch.exists("garply bar")
    >>>     return bool_to_yn(is_foo and is_garply_bar)
    """
    pass

def verify_property(self, object_name, visual_property):
    """Returns True if the object possesses the visual property, and False otherwise.
    Differs from 'exists' in that it presupposes the existence of the object
    specified by object_name, instead checking whether the object possesses
    the property.
    Parameters
    -----
    object_name : str
        A string describing the name of the object to be found in the image.
    visual_property : str
        String describing the simple visual property (e.g., color, shape, material)
        to be checked.

    Examples

```

```
-----
>>> # Do the letters have blue color?
>>> def execute_command(image) -> str:
>>>     image_patch = ImagePatch(image)
>>>     letters_patches = image_patch.find("letters")
>>>     # Question assumes only one letter patch
>>>     return bool_to_ynsno(letters_patches[0].verify_property("letters", "blue"))
"""
pass

def simple_query(self, question):
    """Returns the answer to a basic question asked about the image.
    If no question is provided, returns the answer to "What is this?".
    The questions are about basic perception, and are not meant to be used for
    complex reasoning or external knowledge.
    Parameters
    -----
    question : str
        A string describing the question to be asked.

    Examples
    -----
    >>> # Which kind of baz is not fredding?
    >>> def execute_command(image) -> str:
    >>>     image_patch = ImagePatch(image)
    >>>     baz_patches = image_patch.find("baz")
    >>>     for baz_patch in baz_patches:
    >>>         if not baz_patch.verify_property("baz", "fredding"):
    >>>             return baz_patch.simple_query("What is this baz?")

    >>> # What color is the foo?
    >>> def execute_command(image) -> str:
    >>>     image_patch = ImagePatch(image)
    >>>     foo_patches = image_patch.find("foo")
    >>>     foo_patch = foo_patches[0]
    >>>     return foo_patch.simple_query("What is the color?")

    >>> # Is the second bar from the left quuxy?
    >>> def execute_command(image) -> str:
    >>>     image_patch = ImagePatch(image)
    >>>     bar_patches = image_patch.find("bar")
    >>>     bar_patches.sort(key=lambda x: x.horizontal_center)
    >>>     bar_patch = bar_patches[1]
    >>>     return bar_patch.simple_query("Is the bar quuxy?")
    """
    pass

def crop_left_of_bbox(self, left, lower, right, upper):
    """Returns an ImagePatch object representing the area to the left of the given
    bounding box coordinates.

    Parameters
    -----
    left, lower, right, upper : int
        The coordinates of the bounding box.

    Returns
    -----
    ImagePatch
        An ImagePatch object representing the cropped area.

    Examples
    -----
    >>> # Is the bar to the left of the foo quuxy?
    >>> def execute_command(image) -> str:
    >>>     image_patch = ImagePatch(image)
    >>>     foo_patch = image_patch.find("foo")[0]
    >>>     left_of_foo_patch = image_patch.crop_left_of_bbox(
    >>>         foo_patch.left, foo_patch.lower, foo_patch.right, foo_patch.upper
    >>>     )
    >>>     return bool_to_ynsno(left_of_foo_patch.verify_property("bar", "quuxy"))
    """
    pass

def crop_right_of_bbox(self, left, lower, right, upper):
    """Returns an ImagePatch object representing the area to the right of the given
    bounding box coordinates.
```

492  
493  
494  
495  
496  
497  
498  
499  
500  
501  
502  
503  
504  
505  
506  
507  
508  
509  
510  
511  
512  
513  
514  
515  
516  
517  
518  
519  
520  
521  
522  
523  
524  
525  
526  
527  
528  
529  
530  
531  
532  
533  
534  
535  
536  
537  
538  
539  
540  
541  
542  
543  
544  
545  
546  
547  
548  
549  
550  
551  
552  
553  
554  
555  
556  
557  
558  
559  
560  
561  
562  
563  
564  
565  
566  
567  
568  
569  
570



```
Parameters
-----
left, lower, right, upper : int
    The coordinates of the bounding box.

Returns
-----
ImagePatch
    An ImagePatch object representing the cropped area.

Examples
-----
>>> # Is the bar to the right of the foo quuxy?
>>> def execute_command(image) -> str:
>>>     image_patch = ImagePatch(image)
>>>     foo_patch = image_patch.find("foo")[0]
>>>     right_of_foo_patch = image_patch.crop_right_of_bbox(
>>>         foo_patch.left, foo_patch.lower, foo_patch.right, foo_patch.upper
>>>     )
>>>     return bool_to_ynsno(right_of_foo_patch.verify_property("bar", "quuxy"))
>>> """
pass

def crop_below_bbox(self, left, lower, right, upper):
    """Returns an ImagePatch object representing the area below the given
    bounding box coordinates.

    Parameters
    -----
    left, lower, right, upper : int
        The coordinates of the bounding box.

    Returns
    -----
    ImagePatch
        An ImagePatch object representing the cropped area.

    Examples
    -----
    >>> # Is the bar below the foo quuxy?
    >>> def execute_command(image) -> str:
    >>>     image_patch = ImagePatch(image)
    >>>     foo_patch = image_patch.find("foo")[0]
    >>>     below_foo_patch = image_patch.crop_below_bbox(
    >>>         foo_patch.left, foo_patch.lower, foo_patch.right, foo_patch.upper
    >>>     )
    >>>     return bool_to_ynsno(below_foo_patch.verify_property("bar", "quuxy"))
    >>> """
    pass

def crop_above_bbox(self, left, lower, right, upper):
    """Returns an ImagePatch object representing the area above the given
    bounding box coordinates.

    Parameters
    -----
    left, lower, right, upper : int
        The coordinates of the bounding box.

    Returns
    -----
    ImagePatch
        An ImagePatch object representing the cropped area.

    Examples
    -----
    >>> # Is the bar above the foo quuxy?
    >>> def execute_command(image) -> str:
    >>>     image_patch = ImagePatch(image)
    >>>     foo_patch = image_patch.find("foo")[0]
    >>>     above_foo_patch = image_patch.crop_above_bbox(
    >>>         foo_patch.left, foo_patch.lower, foo_patch.right, foo_patch.upper
    >>>     )
    >>>     return bool_to_ynsno(above_foo_patch.verify_property("bar", "quuxy"))
    >>> """
    pass
```

```

def best_image_match(list_patches: List[ImagePatch], content: List[str], return_index=False) ->
    Union[ImagePatch, int]:
    """Returns the patch most likely to contain the content.
    Parameters
    -----
    list_patches : List[ImagePatch]
    content : List[str]
        the object of interest
    return_index : bool
        if True, returns the index of the patch most likely to contain the object

    Returns
    -----
    int
        Patch most likely to contain the object
    """
    return best_image_match(list_patches, content, return_index)

def bool_to_yesno(bool_answer: bool) -> str:
    return "yes" if bool_answer else "no"

Write a function using Python and the ImagePatch class (above) that could be executed to provide an
answer to the query.

Consider the following guidelines:
- Use base Python (comparison, sorting) for basic logical operations, left/right/up/down, math, etc.

# Examples of how to use the API
INSERT_CONTEXT_HERE

Query: INSERT_QUERY_HERE
Program:

```

### Listing 2. VQA In-Context Examples

```

# Query: Is the vehicle in the top of the image?
def execute_command(image) -> str:
    image_patch = ImagePatch(image)
    # Assume there's only one vehicle patch.
    vehicle_patch = image_patch.find("vehicle")[0]
    vehicle_in_top_half = vehicle_patch.vertical_center > image_patch.vertical_center
    return bool_to_yesno(vehicle_in_top_half)

# Query: Are there trains or fences in this scene?
def execute_command(image) -> str:
    image_patch = ImagePatch(image)
    trains = image_patch.find("train")
    fences = image_patch.find("fence")
    has_trains_or_fences = len(trains) > 0 or len(fences) > 0
    return bool_to_yesno(has_trains_or_fences)

# Query: Is the pillow in the top part or in the bottom of the picture?
def execute_command(image) -> str:
    image_patch = ImagePatch(image)
    pillow_patches = image_patch.find("pillow")
    pillow_patch = pillow_patches[0]
    pillow_in_top_half = pillow_patch.vertical_center > image_patch.vertical_center
    if pillow_in_top_half:
        return "top"
    else:
        return "bottom"

# Query: What color is the curtain that is to the right of the mirror?
def execute_command(image) -> str:
    image_patch = ImagePatch(image)
    mirror_patches = image_patch.find("mirror")
    mirror_patch = mirror_patches[0]
    right_of_mirror_patch = image_patch.crop_right_of_bbox(
        mirror_patch.left, mirror_patch.lower, mirror_patch.right, mirror_patch.upper
    )
    return right_of_mirror_patch.simple_query("What color is the curtain?")

```

### Listing 3. ITM In-Context Examples

```

# Query: Verify image matches text="An airplane is flying in the sky, and birds are flying below it."
def execute_command(image) -> str:
    image_patch = ImagePatch(image)
    airplane_patches = image_patch.find("airplane")

```

```

721 bird_patches = image_patch.find("bird")
722
723 airplane_in_sky = any(
724     airplane_patch.vertical_center > image_patch.height * 0.6
725     for airplane_patch in airplane_patches
726 )
727
728 birds_below_airplane = any(
729     bird_patch.upper <= airplane_patch.lower
730     for bird_patch in bird_patches for airplane_patch in airplane_patches
731 )
732
733 return bool_to_ynsno(airplane_in_sky and birds_below_airplane)
734
735 # Query: Verify image matches text="The bird is flying above the tree, and a cat is sitting under the
736 tree."
737 def execute_command(image) -> str:
738     image_patch = ImagePatch(image)
739     bird_patches = image_patch.find("bird")
740     tree_patches = image_patch.find("tree")
741     cat_patches = image_patch.find("cat")
742
743     bird_above_tree = any(
744         bird_patch.lower >= tree_patch.upper and
745         abs(bird_patch.horizontal_center - tree_patch.horizontal_center) < 50
746         for bird_patch in bird_patches for tree_patch in tree_patches
747     )
748
749     cat_under_tree = any(
750         cat_patch.upper <= tree_patch.lower and
751         abs(cat_patch.horizontal_center - tree_patch.horizontal_center) < 50
752         for cat_patch in cat_patches for tree_patch in tree_patches
753     )
754
755     return bool_to_ynsno(bird_above_tree and cat_under_tree)
756
757 # Query: Verify image matches text="The apple is on top of the book, and the pen is beside the book."
758 def execute_command(image) -> str:
759     image_patch = ImagePatch(image)
760     apple_patches = image_patch.find("apple")
761     book_patches = image_patch.find("book")
762     pen_patches = image_patch.find("pen")
763
764     apple_on_book = any(
765         apple_patch.lower >= book_patch.upper and
766         book_patch.left <= apple_patch.horizontal_center <= book_patch.right
767         for apple_patch in apple_patches for book_patch in book_patches
768     )
769
770     pen_beside_book = any(
771         abs(pen_patch.horizontal_center - book_patch.horizontal_center) < 50 and
772         abs(pen_patch.vertical_center - book_patch.vertical_center) < 100
773         for pen_patch in pen_patches for book_patch in book_patches
774     )
775
776     return bool_to_ynsno(apple_on_book and pen_beside_book)
777
778 #Query: Verify image matches text="A man is riding a bicycle, and a dog is running beside him."
779 def execute_command(image) -> str:
780     image_patch = ImagePatch(image)
781     man_patches = image_patch.find("man")
782     bicycle_patches = image_patch.find("bicycle")
783     dog_patches = image_patch.find("dog")
784
785     man_on_bicycle = any(
786         man_patch.left <= bicycle_patch.right and man_patch.right >= bicycle_patch.left and
787         man_patch.lower <= bicycle_patch.upper and man_patch.upper >= bicycle_patch.lower
788         for man_patch in man_patches for bicycle_patch in bicycle_patches
789     )
790
791     dog_beside_man = any(
792         abs(dog_patch.horizontal_center - man_patch.horizontal_center) < 100 and
793         abs(dog_patch.vertical_center - man_patch.vertical_center) < 50
794         for dog_patch in dog_patches for man_patch in man_patches
795     )
796
797     return bool_to_ynsno(man_on_bicycle and dog_beside_man)

```

Listing 4. Reprompting with Unit Tests VQA

## INSERT\_IMAGE\_PATCH\_API

You are provided a Python program that answers a query about an image, with a **set** of tests with the corresponding outputs **and** expected responses.

Correct the Python program such that it passes the tests.

- Ensure the corrected program **is** different than the incorrect program provided.

Query: Is there a blue chair **in** the image?

Incorrect Program:

```
def execute_command(image):
    image_patch = ImagePatch(image)
    blue_chair = image_patch.find("chair")
    if not blue_chair:
        return "No"
    is_blue = any([chair.verify_property("blue") for chair in blue_chair])
    return "Yes" if is_blue else "No"
```

Test Cases:

Test A

Image Content: "A room with a red chair"

Ground Truth Answer: "No"

Program Output: "Error: verify\_property() missing 1 required positional argument: 'visual\_property'"

Test B

Image Content: "A room with a blue chair under the window"

Ground Truth Answer: "Yes"

Program Output: "Error: verify\_property() missing 1 required positional argument: 'visual\_property'"

Test C

Image Content: "An empty room"

Ground Truth Answer: "No"

Program Output: "No"

Test D

Image Content: "A garden with a blue chair"

Ground Truth Answer: "Yes"

Program Output: "Error: verify\_property() missing 1 required positional argument: 'visual\_property'"

Test E

Image Content: "A room with several chairs, all red"

Ground Truth Answer: "No"

Program Output: "Error: verify\_property() missing 1 required positional argument: 'visual\_property'"

Corrected Program:

```
def execute_command(image):
    image_patch = ImagePatch(image)
    chair_patches = image_patch.find("chair")
    if not chair_patches:
        return "No" # No chairs found
    blue_chair_found = any(chair.verify_property("chair", "blue") for chair in chair_patches)
    return "Yes" if blue_chair_found else "No"
```

Query: "Are there any flowers to the left of the house?"

Incorrect Program:

```
def execute_command(image):
    image_patch = ImagePatch(image)
    house_patches = image_patch.find("house")
    if not house_patches:
        return "No house found"
    left_of_house_patch = image_patch.crop_left_of_bbox(
        house_patches.left, house_patches.lower, house_patches.right, house_patches.upper
    ) # Incorrect attribute access
    return "Yes" if left_of_house_patch.exists("flower") else "No"
```

Test Cases:

Test A

Image Content: "An image of a garden without any buildings."

Ground Truth Answer: "No house found"

Program Output: "Error: 'list' object has no attribute 'left'"

Test B

Image Content: "A house without a garden"

Ground Truth Answer: "No flowers found"

Program Output: "Error: 'list' object has no attribute 'left'"

Test C

Image Content: "A house with many flowers around"

Ground Truth Answer: "Yes"

Program Output: "Error: 'list' object has no attribute 'left'"

Test D

Image Content: "A house with flowers only on the right side"

Ground Truth Answer: "No"

Program Output: "Error: 'list' object has no attribute 'left'"

Test E

Image Content: "An image with flowers but no house"

Ground Truth Answer: "No house found"

Program Output: "Error: 'list' object has no attribute 'left'"

Corrected Program:

```

877 def execute_command(image):
878     image_patch = ImagePatch(image)
879     house_patches = image_patch.find("house")
880     if not house_patches:
881         return "No house found"
882     for house_patch in house_patches:
883         left_of_house_patch = image_patch.crop_left_of_bbox(
884             house_patch.left, house_patch.lower, house_patch.right, house_patch.upper
885         )
886         flowers_found = left_of_house_patch.find("flower")
887         if flowers_found:
888             return "Yes"
889     return "No"
890
891 Query: Who wears a green shirt?
892 Incorrect Program:
893 def execute_command(image):
894     image_patch = ImagePatch(image)
895     people_patches = image_patch.find("person")
896     if not people_patches:
897         return "No one"
898     person_wearing_green_shirt = None
899     for index, person_patch in enumerate(people_patches):
900         green_patches = person_patch.find("green")
901         if green_patches:
902             person_wearing_green_shirt = index
903             break
904     if person_wearing_green_shirt == None:
905         return "No one"
906     else:
907         return people_patches[person_wearing_green_shirt].simple_query("Who is this?")
908
909 Test Cases:
910 Test A
911 Image Content: "An image of an empty room"
912 Ground Truth Answer: "No one"
913 Program Output: "No one"
914 Test B
915 Image Content: "A young girl wearing a green dress and a boy wearing a blue shirt."
916 Ground Truth Answer: "No one"
917 Program Output: "girl"
918 Test C
919 Image Content: "A man wearing a red shirt and a woman wearing a green shirt."
920 Ground Truth Answer: "woman"
921 Program Output: "woman"
922 Test D
923 Image Content: "A boy wearing a green shirt."
924 Ground Truth Answer: "boy"
925 Program Output: "boy"
926 Test E
927 Image Content: "Two people wearing green shirts: a man and a woman"
928 Ground Truth Answer: "man and woman"
929 Program Output: "man"
930 Corrected Program:
931 def execute_command(image):
932     image_patch = ImagePatch(image)
933     people_patches = image_patch.find("person")
934     if not people_patches:
935         return "No people found"
936     people_wearing_green_shirts = []
937     for index, person_patch in enumerate(people_patches):
938         if person_patch.verify_property("clothing", "shirt") and person_patch.verify_property("color",
939             "green"):
940             people_wearing_green_shirts.append(index)
941     if not people_wearing_green_shirts:
942         return "No one"
943     wearing_green_shirts = ' and '.join([people_patches[i].simple_query("Who is this?") for i in
944         people_wearing_green_shirts])
945     return wearing_green_shirts
946
947 Query: "Is the blue ball inside the box?"
948 Incorrect Program:
949 def execute_command(image):
950     image_patch = ImagePatch(image)
951     ball_patches = image_patch.find("ball")
952     if not ball_patches:
953         return "No"
954     blue_ball = [ball for ball in ball_patches if ball.verify_property("color", "blue")]
955     if not blue_ball:
956         return "No" # No blue ball found

```



```

    box_patches = image_patch.find("box")
    if not box_patches:
        return "No"
    return "Yes"
Test Cases:
Test A
Image Content: "A blue ball is outside a box"
Ground Truth Answer: "No"
Program Output: "Yes"
Test B
Image Content: "A red ball is inside a box"
Ground Truth Answer: "No"
Program Output: "No"
Test C
Image Content: "A blue ball is inside a box"
Ground Truth Answer: "Yes"
Program Output: "Yes"
Test D
Image Content: "No balls or boxes in the image"
Ground Truth Answer: "No"
Program Output: "No"
Test E
Image Content: "Multiple blue balls, all outside boxes"
Ground Truth Answer: "No"
Program Output: "Yes"
Corrected Program:
def execute_command(image):
    image_patch = ImagePatch(image)
    ball_patches = image_patch.find("ball")
    if not ball_patches:
        return "No" # No ball found
    blue_ball = [ball for ball in ball_patches if ball.verify_property("color", "blue")]
    if not blue_ball:
        return "No" # No blue ball found
    box_patches = image_patch.find("box")
    if not box_patches:
        return "No" # No box found
    blue_ball_patch = blue_ball[0]
    for box_patch in box_patches:
        if (box_patch.left <= blue_ball_patch.left and
            box_patch.right >= blue_ball_patch.right and
            box_patch.upper <= blue_ball_patch.upper and
            box_patch.lower >= blue_ball_patch.lower):
            return "Yes"
    return "No"

Query: INSERT_QUERY_HERE
Incorrect Program:
INSERT_CODE_HERE
Test Cases:
INSERT_UNIT_TEST_OUTPUTS_HERE
Corrected Program:

```

Listing 5. Reprompting with Unit Tests ITM

```

INSERT_IMAGE_PATCH_API

You are provided a Python program that answers a query about an image, with a set of tests with the
corresponding outputs and exected responses.
Correct the Python program such that it passes the tests.
- Ensure the corrected program is different than the incorrect program provided.

Query: "Verify image matches text="An airplane is flying in the sky, and birds are flying below it.""
Incorrect Program:
def execute_command(image):
    image_patch = ImagePatch(image)
    airplane = image_patch.find("airplane")
    birds = image_patch.find("birds")
    if not airplane or not birds:
        return "No"
    if airplane[0].vertical_center >= birds[0].vertical_center:
        return "Yes"
    return "No"
Test Cases:
Test A
Image Content: "An airplane flying high in the sky with birds below it."
Ground Truth Answer: "Yes"
Program Output: "Yes"

```

```
Test B
Image Content: "Birds are flying above and below an airplane in the sky."
Ground Truth Answer: "No"
Program Output: "Yes"
Test C
Image Content: "An airplane and birds flying side by side."
Ground Truth Answer: "No"
Program Output: "Yes"
Test D
Image Content: "Only an airplane is flying in the sky."
Ground Truth Answer: "No"
Program Output: "No"
Test E
Image Content: "Birds flying in the sky with no airplane present."
Ground Truth Answer: "No"
Program Output: "No"
Corrected Program::
def execute_command(image):
    image_patch = ImagePatch(image)
    airplane_patches = image_patch.find("airplane")
    bird_patches = image_patch.find("bird")
    if not airplane_patches or not bird_patches:
        return "No"
    airplane = airplane_patches[0]
    birds_below = all(bird.vertical_center > airplane.vertical_center for bird in bird_patches)
    return "Yes" if birds_below else "No"

Query: "Verify image matches text='The bird is flying above the tree, and a cat is sitting under the tree.'"
Incorrect Program:
def execute_command(image):
    image_patch = ImagePatch(image)
    tree = image_patch.find("tree")
    bird = image_patch.find("bird")
    cat = image_patch.find("cat")
    if not tree or not bird or not cat:
        return "No"
    if bird[0].vertical_center < tree[0].vertical_center and cat[0].vertical_center > tree[0].vertical_center:
        return "Yes"
    return "No"

Test Cases:
Test A
Image Content: "A bird flying above a tree and a cat under the tree."
Ground Truth Answer: "Yes"
Program Output: "Yes"
Test B
Image Content: "A cat sitting above the tree and a bird flying below it."
Ground Truth Answer: "No"
Program Output: "Yes"
Test C
Image Content: "A bird sitting in the tree with no cat around."
Ground Truth Answer: "No"
Program Output: "No"
Test D
Image Content: "A cat climbing the tree while a bird flies overhead."
Ground Truth Answer: "No"
Program Output: "Yes"
Test E
Image Content: "A bird flying above a tree with a dog under the tree."
Ground Truth Answer: "No"
Program Output: "No"
Corrected Program:
def execute_command(image):
    image_patch = ImagePatch(image)
    tree_patches = image_patch.find("tree")
    bird_patches = image_patch.find("bird")
    cat_patches = image_patch.find("cat")
    if not tree_patches or not bird_patches or not cat_patches:
        return "No"
    tree = tree_patches[0]
    bird_above = all(bird.vertical_center < tree.vertical_center for bird in bird_patches)
    cat_below = all(cat.vertical_center > tree.vertical_center for cat in cat_patches)
    return "Yes" if bird_above and cat_below else "No"

Query: "Verify image matches text='A car is parked near a tree, and a bird is sitting on the tree.'"
Incorrect Program:
def execute_command(image):
    image_patch = ImagePatch(image)
```

```

car = image_patch.find("car")
tree = image_patch.find("tree")
bird = image_patch.find("bird")
if not car or not tree or not bird:
    return "No"
if car.horizontal_center - tree.horizontal_center < 100 and bird.vertical_center <
    tree.vertical_center:
    return "Yes"
return "No"
Test Cases:
Test A
Image Content: "A car parked near a tree with a bird sitting on it."
Ground Truth Answer: "Yes"
Program Output: AttributeError: 'list' object has no attribute 'horizontal_center'
Test B
Image Content: "A car far from a tree with a bird on the ground."
Ground Truth Answer: "No"
Program Output: AttributeError: 'list' object has no attribute 'horizontal_center'
Test C
Image Content: "A tree with a bird on it but no car nearby."
Ground Truth Answer: "No"
Program Output: "No"
Test D
Image Content: "A car parked near a tree with no bird in sight."
Ground Truth Answer: "No"
Program Output: AttributeError: 'list' object has no attribute 'horizontal_center'
Test E
Image Content: "A car and a bird but no tree present."
Ground Truth Answer: "No"
Program Output: AttributeError: 'list' object has no attribute 'horizontal_center'
Corrected Program:
def execute_command(image):
    image_patch = ImagePatch(image)
    car_patches = image_patch.find("car")
    tree_patches = image_patch.find("tree")
    bird_patches = image_patch.find("bird")
    if not car_patches or not tree_patches or not bird_patches:
        return "No"
    car = car_patches[0]
    tree = tree_patches[0]
    bird = bird_patches[0]
    car_near_tree = abs(car.horizontal_center - tree.horizontal_center) < 100
    bird_on_tree = bird.vertical_center < tree.vertical_center
    return "Yes" if car_near_tree and bird_on_tree else "No"
Query: "Verify image matches text="A man is holding a red balloon, and a child is reaching up to grab
it.""
Incorrect Program:
def execute_command(image):
    image_patch = ImagePatch(image)
    man = image_patch.find("man")
    balloon = image_patch.find("balloon")
    child = image_patch.find("child")
    if not man or not balloon or not child:
        return "No"
    if balloon[0].verify_property("red") and child[0].vertical_center < balloon[0].vertical_center:
        return "Yes"
    return "No"
Test Cases:
Test A
Image Content: "A man holding a red balloon, with a child reaching up."
Ground Truth Answer: "Yes"
Program Output: TypeError: verify_property() missing 1 required positional argument: 'visual_property'
Test B
Image Content: "A man holding a blue balloon, with a child below him."
Ground Truth Answer: "No"
Program Output: TypeError: verify_property() missing 1 required positional argument: 'visual_property'
Test C
Image Content: "A man holding a flower, with a child next to him."
Ground Truth Answer: "No"
Program Output: "No"
Corrected Program:
def execute_command(image):
    image_patch = ImagePatch(image)
    man_patches = image_patch.find("man")
    balloon_patches = image_patch.find("balloon")
    child_patches = image_patch.find("child")
    if not man_patches or not balloon_patches or not child_patches:
        return "No"

```

1111  
1112  
1113  
1114  
1115  
1116  
1117  
1118  
1119  
1120  
1121  
1122  
1123  
1124  
1125  
1126  
1127  
1128  
1129  
1130  
1131  
1132  
1133  
1134  
1135  
1136  
1137  
1138  
1139  
1140  
1141  
1142  
1143  
1144  
1145  
1146  
1147  
1148  
1149  
1150  
1151  
1152  
1153  
1154  
1155  
1156  
1157  
1158  
1159  
1160  
1161  
1162  
1163  
1164  
1165  
1166  
1167  
1168  
1169  
1170  
1171  
1172  
1173  
1174  
1175  
1176  
1177  
1178  
1179  
1180  
1181  
1182  
1183  
1184  
1185  
1186  
1187  
1188  
1189

```

1190     balloon = balloon_patches[0]
1191     is_red_balloon = balloon.verify_property("balloon", "red")
1192     child_below_balloon = all(child.vertical_center < balloon.vertical_center for child in
1193         child_patches)
1194     return "Yes" if is_red_balloon and child_below_balloon else "No"
1195
1196 Query: "Verify image matches text="A cat is sitting on the table, and a book is lying beside it.""
1197 Incorrect Program:
1198 def execute_command(image):
1199     image_patch = ImagePatch(image)
1200     cat = image_patch.find("cat")
1201     book = image_patch.find("book")
1202     if not cat or not book:
1203         return "No"
1204     if abs(book[0].horizontal_center - cat[0].horizontal_center) < 50:
1205         return "Yes"
1206     return "No"
1207
1208 Test Cases:
1209 Test A
1210 Image Content: "A cat sitting on the table with a book beside it."
1211 Ground Truth Answer: "Yes"
1212 Program Output: "Yes"
1213 Test B
1214 Image Content: "A cat sitting on the floor with a book beside it."
1215 Ground Truth Answer: "No"
1216 Program Output: "Yes"
1217 Test C
1218 Image Content: "A cat sitting on the table with no book around."
1219 Ground Truth Answer: "No"
1220 Program Output: "No"
1221 Test D
1222 Image Content: "A book lying on the table with no cat in sight."
1223 Ground Truth Answer: "No"
1224 Program Output: "No"
1225 Test E
1226 Image Content: "A cat sitting on the table with a book on the floor."
1227 Ground Truth Answer: "No"
1228 Program Output: "Yes"
1229 Corrected Program:
1230 def execute_command(image):
1231     image_patch = ImagePatch(image)
1232     cat_patches = image_patch.find("cat")
1233     book_patches = image_patch.find("book")
1234     table_patches = image_patch.find("table")
1235     if not cat_patches or not book_patches or not table_patches:
1236         return "No"
1237     cat = cat_patches[0]
1238     book = book_patches[0]
1239     table = table_patches[0]
1240     is_cat_on_table = cat.vertical_center < table.vertical_center and abs(cat.horizontal_center -
1241         table.horizontal_center) < 50
1242     is_book_beside_cat = abs(book.horizontal_center - cat.horizontal_center) < 50
1243     return "Yes" if is_cat_on_table and is_book_beside_cat else "No"
1244
1245 Query: INSERT_QUERY_HERE
1246 Incorrect Program:
1247 INSERT_CODE_HERE
1248 Test Cases:
1249 INSERT_UNIT_TEST_OUTPUTS_HERE
1250 Corrected Program:

```

Listing 6. VQA Unit Test Generation In Context Examples

```

1250 Query: Is there a cat or dog in the image?
1251 Tests:
1252 1. Image Caption: "A grey tabby cat peacefully napping on a plush sofa" Answer: yes
1253 2. Image Caption: "A lively golden retriever bounding across a grassy field in the park" Answer: yes
1254 3. Image Caption: "Twin Siamese cats playfully swatting at a bright yellow ball" Answer: yes
1255 4. Image Caption: "A cluster of wild horses trotting along the sandy shores of a sunlit beach" Answer:
1256     no
1257 5. Image Caption: "An orange cat and a black Labrador playfully tugging on a rope toy" Answer: yes
1258 6. Image Caption: "A modern living room featuring sleek furniture and devoid of any pets" Answer: no
1259
1260 Query: Is there a red truck or bus in the image?
1261 Tests:
1262 1. Image Caption: "A vibrant red Ford pickup parked beside a country road" Answer: yes
1263 2. Image Caption: "A red double-decker bus navigating through a busy downtown street" Answer: yes
1264 3. Image Caption: "A large blue semi-truck cruising down an interstate highway" Answer: no

```

|                                                                                                                    |      |
|--------------------------------------------------------------------------------------------------------------------|------|
| 4. Image Caption: "A quiet suburban street devoid of any large vehicles like buses or trucks" Answer: no           | 1265 |
| 5. Image Caption: "A shiny red Ferrari speeding on a professional race track" Answer: no                           | 1266 |
| 6. Image Caption: "An array of red delivery trucks lined up in a distribution center parking lot" Answer: yes      | 1267 |
| 7. Image Caption: "Several bright yellow school buses parked in a row at a local school" Answer: no                | 1268 |
| Query: What color <b>is</b> the largest car <b>in</b> the image?                                                   | 1269 |
| Tests:                                                                                                             | 1270 |
| 1. Image Caption: "A large blue Ford pickup truck driving on a busy highway" Answer: blue                          | 1271 |
| 2. Image Caption: "A city street empty of any large vehicles like buses or trucks" Answer: no answer               | 1272 |
| 3. Image Caption: "A row of green food trucks serving lunch in an urban park" Answer: green                        | 1273 |
| 4. Image Caption: "A scene with a green public bus next to a smaller blue pickup at an intersection" Answer: green | 1274 |
| Query: Is the vase to the left <b>or</b> right of the center?                                                      | 1275 |
| Tests:                                                                                                             | 1276 |
| 1. Image Caption: "A delicate porcelain vase positioned on the right end of a mahogany dining table" Answer: right | 1277 |
| 2. Image Caption: "A tall glass vase sitting on the left side of a neatly made bed in a sunlit room" Answer: left  | 1278 |
| 3. Image Caption: "A ceramic vase centrally placed on a round table surrounded by chairs" Answer: center           | 1279 |
| Query: What <b>is</b> the highest <b>object in</b> the image?                                                      | 1280 |
| Tests:                                                                                                             | 1281 |
| 1. Image Caption: "A massive skyscraper dominating the skyline among lower city buildings" Answer: skyscraper      | 1282 |
| 2. Image Caption: "A lone oak tree surpassing the height of the cottage it stands next to" Answer: tree            | 1283 |
| 3. Image Caption: "Colorful balloons drifting above the treetops in a clear sky" Answer: balloons                  | 1284 |
| 4. Image Caption: "A commercial jet flying high above the city's tallest skyscrapers" Answer: plane                | 1285 |
| 5. Image Caption: "A majestic eagle soaring high above a vast canyon landscape" Answer: eagle                      | 1286 |
| 6. Image Caption: "A figure standing on the peak of a grassy hill under a blue sky" Answer: person                 | 1287 |
| Query: INSERT_QUERY_HERE                                                                                           | 1288 |
| Tests:                                                                                                             | 1289 |
|                                                                                                                    | 1290 |
|                                                                                                                    | 1291 |
|                                                                                                                    | 1292 |
|                                                                                                                    | 1293 |
|                                                                                                                    | 1294 |
|                                                                                                                    | 1295 |
|                                                                                                                    | 1296 |
|                                                                                                                    | 1297 |
|                                                                                                                    | 1298 |
|                                                                                                                    | 1299 |
|                                                                                                                    | 1300 |

## Listing 7. ITM Unit Test Generation In Context Examples

|                                                                                                                   |      |
|-------------------------------------------------------------------------------------------------------------------|------|
| Query: Is the drawing of a tree on the hill, <b>and</b> a river that flows at the bottom of the hill?             | 1301 |
| Tests:                                                                                                            | 1302 |
| 1. Image Caption: "A solitary tree stands atop a gentle hill, with a flowing river winding below it." Answer: yes | 1303 |
| 2. Image Caption: "A tree on a grassy hill under a clear sky." Answer: no                                         | 1304 |
| 3. Image Caption: "A river meandering through a dense forest of tall trees." Answer: no                           | 1305 |
| 4. Image Caption: "A panoramic view of rolling hills in the desert, with a river at the bottom." Answer: no       | 1306 |
| 5. Image Caption: "A vast plain with a river running through fields of wildflowers." Answer: no                   | 1307 |
| 6. Image Caption: "A hill with multiple trees and a river flowing nearby." Answer: yes                            | 1308 |
| Query: Is the drawing of an airplane flying <b>in</b> the sky, <b>and</b> birds flying below it?                  | 1309 |
| Tests:                                                                                                            | 1310 |
| 1. Image Caption: "An airplane soars through the sky, with a flock of birds flying beneath it." Answer: yes       | 1311 |
| 2. Image Caption: "Birds flying over a tranquil lake under a clear sky." Answer: no                               | 1312 |
| 3. Image Caption: "An airplane performing aerobatic maneuvers, with birds flying above it." Answer: no            | 1313 |
| 4. Image Caption: "An airplane floating in the sea with birds flying above it." Answer: Yes                       | 1314 |
| 5. Image Caption: "An airplane in a clear sky" Answer: no                                                         | 1315 |
| Query: Is the drawing of a girl holding an umbrella <b>in</b> the rain?                                           | 1316 |
| Tests:                                                                                                            | 1317 |
| 1. Image Caption: "A girl holding an umbrella walks through a rainy street." Answer: yes                          | 1318 |
| 2. Image Caption: "A girl holds an umbrella under a bright sun in the park." Answer: no                           | 1319 |
| 3. Image Caption: "A girl stands in the rain wearing a colorful raincoat and holding flowers." Answer: no         | 1320 |
| 4. Image Caption: "A girl walks her dog while holding an umbrella on a rainy day." Answer: yes                    | 1321 |
| Query: Is the drawing of a person sitting at a desk with a computer monitor <b>in</b> front of them?              | 1322 |
| Tests:                                                                                                            | 1323 |
| 1. Image Caption: "A person sitting at a desk, writing in a notebook with a lamp beside them." Answer: no         | 1324 |
| 2. Image Caption: "Someone sitting at a desk cluttered with papers and a computer monitor." Answer: yes           | 1325 |
| 3. Image Caption: "Someone sitting at a desk cluttered with papers and a computer monitor." Answer: yes           | 1326 |
| 3. Image Caption: "A person with a big computer screen in the background" Answer: no                              | 1327 |
| Query: Is the drawing of a man riding a bicycle, <b>and</b> a dog running beside him?                             | 1328 |
| Tests:                                                                                                            | 1329 |
| 1. Image Caption: "A man cycling alone on a mountain trail surrounded by trees." Answer: no                       | 1330 |
|                                                                                                                   | 1331 |
|                                                                                                                   | 1332 |
|                                                                                                                   | 1333 |
|                                                                                                                   | 1334 |
|                                                                                                                   | 1335 |
|                                                                                                                   | 1336 |
|                                                                                                                   | 1337 |
|                                                                                                                   | 1338 |
|                                                                                                                   | 1339 |
|                                                                                                                   | 1340 |



```

1341 2. Image Caption: "A man rides a bicycle along the beach, his dog running beside him." Answer: yes
1342 3. Image Caption: "A bicycle and a dog" Answer: no
1343 4. Image Caption: "A dog next to a car" Answer: no
1344 5. Image Caption: "A man walking his dog" Answer: no
1345 6. Image Caption: "A man rides a bicycle down a sunny street with a dog running beside him." Answer:
1346     yes
1347
1348 Query: INSERT_QUERY_HERE
1349 Tests:

```

Listing 8. VQA Unit Test Generation with Implementation In-Context Examples

```

1350 # Query: Is there a cat or dog in the image?
1351 def execute_command(image) -> str:
1352     image_patch = ImagePatch(image)
1353     cats = image_patch.find("cat")
1354     dogs = image_patch.find("dog")
1355     has_cats_or_dogs = len(cats) > 0 or len(dogs) > 0
1356     return bool_to_yneno(has_cats_or_dogs)
1357
1358 Tests:
1359 1. Image Caption: "A grey tabby cat peacefully napping on a plush sofa" Answer: yes
1360 2. Image Caption: "A lively golden retriever bounding across a grassy field in the park" Answer: yes
1361 3. Image Caption: "Twin Siamese cats playfully swatting at a bright yellow ball" Answer: yes
1362 4. Image Caption: "A cluster of wild horses trotting along the sandy shores of a sunlit beach" Answer:
1363     no
1364 5. Image Caption: "An orange cat and a black Labrador playfully tugging on a rope toy" Answer: yes
1365 6. Image Caption: "A modern living room featuring sleek furniture and devoid of any pets" Answer: no
1366
1367 # Query: Is there a red truck or bus in the image?
1368 def execute_command(image) -> str:
1369     image_patch = ImagePatch(image)
1370     trucks = image_patch.find("truck")
1371     buses = image_patch.find("bus")
1372     red_trucks = [truck for truck in trucks if truck.verify_property("truck", "red")]
1373     red_buses = [bus for bus in buses if bus.verify_property("bus", "red")]
1374     has_red_trucks_or_buses = len(red_trucks) > 0 or len(red_buses) > 0
1375     return bool_to_yneno(has_red_trucks_or_buses)
1376
1377 Tests:
1378 1. Image Caption: "A vibrant red Ford pickup parked beside a country road" Answer: yes
1379 2. Image Caption: "A red double-decker bus navigating through a busy downtown street" Answer: yes
1380 3. Image Caption: "A large blue semi-truck cruising down an interstate highway" Answer: no
1381 4. Image Caption: "A quiet suburban street devoid of any large vehicles like buses or trucks" Answer:
1382     no
1383 5. Image Caption: "A shiny red Ferrari speeding on a professional race track" Answer: no
1384 6. Image Caption: "An array of red delivery trucks lined up in a distribution center parking lot"
1385     Answer: yes
1386 7. Image Caption: "Several bright yellow school buses parked in a row at a local school" Answer: no
1387
1388 # Query: What color is the largest car in the image?
1389 def execute_command(image) -> str:
1390     image_patch = ImagePatch(image)
1391     car_patches = image_patch.find("car")
1392     if not car_patches:
1393         return "No cars found in the image."
1394     # Sort cars by their area to find the largest one
1395     car_patches.sort(key=lambda x: x.area, reverse=True)
1396     largest_car_patch = car_patches[0]
1397     color_of_largest_car = largest_car_patch.simple_query("What is the color?")
1398     return color_of_largest_car
1399
1400 Tests:
1401 1. Image Caption: "A large blue Ford pickup truck driving on a busy highway" Answer: blue
1402 2. Image Caption: "A city street empty of any large vehicles like buses or trucks" Answer: no answer
1403 3. Image Caption: "A row of green food trucks serving lunch in an urban park" Answer: green
1404 4. Image Caption: "A scene with a green public bus next to a smaller blue pickup at an intersection"
1405     Answer: green
1406
1407 # Query: Is the vase to the left or right of the center?
1408 def execute_command(image) -> str:
1409     image_patch = ImagePatch(image)
1410     vase_patches = image_patch.find("vase")
1411     if not vase_patches:
1412         return "No vases found in the image."
1413     vase_patch = vase_patches[0]
1414     vase_position = vase_patch.horizontal_center
1415     image_center = (image_patch.left + image_patch.right) / 2
1416     if vase_position < image_center:
1417         return "left"
1418     elif vase_position > image_center:

```

```

        return "right"
    else:
        return "center"
Tests:
1. Image Caption: "A delicate porcelain vase positioned on the right end of a mahogany dining table" Answer: right
2. Image Caption: "A tall glass vase sitting on the left side of a neatly made bed in a sunlit room" Answer: left
3. Image Caption: "A ceramic vase centrally placed on a round table surrounded by chairs" Answer: center

# Query: What is the highest object in the image?
def execute_command(image) -> str:
    image_patch = ImagePatch(image)
    possible_objects = ["car", "tree", "building", "person", "vase", "animal", "vehicle", "furniture"]
    all_patches = []
    for obj in possible_objects:
        all_patches.extend(image_patch.find(obj))
    if not all_patches:
        return "No objects found in the image."
    highest_patch = max(all_patches, key=lambda x: x.upper)
    highest_object_name = highest_patch.simple_query("What is this?")
    return highest_object_name
Tests:
1. Image Caption: "A massive skyscraper dominating the skyline among lower city buildings" Answer: skyscraper
2. Image Caption: "A lone oak tree surpassing the height of the cottage it stands next to" Answer: tree
3. Image Caption: "Colorful balloons drifting above the treetops in a clear sky" Answer: balloons
4. Image Caption: "A commercial jet flying high above the city's tallest skyscrapers" Answer: plane
5. Image Caption: "A majestic eagle soaring high above a vast canyon landscape" Answer: eagle
6. Image Caption: "A figure standing on the peak of a grassy hill under a blue sky" Answer: person

Create test cases for the specified query and program using the format provided in the examples.
The test cases should consist of image captions and answers to the query.
The answers should be concise, limited to a single word.

Query: INSERT_QUERY_HERE
Program:
INSERT_PROGRAM_HERE
Tests:

```

### Listing 9. Example Code

```

I will provide you with a caption for a photo, image, or painting.
Your task is to generate the bounding boxes for the objects mentioned in the caption, along with a
background prompt describing the scene.
The images are of size 512x512. The top-left corner has coordinate [0, 0].
The bottom-right corner has coordinate [512, 512].
The bounding boxes should not overlap or go beyond the image boundaries.
Each bounding box should be in the format of (object name, [top-left x coordinate, top-left y
coordinate, box width, box height]) and should not include more than one object.
Do not put objects that are already provided in the bounding boxes into the background prompt. Do not
include non-existing or excluded objects in the background prompt.
Use "A realistic scene" as the background prompt if no background is given in the prompt. If needed,
you can make reasonable guesses.
Please refer to the example below for the desired format.

Caption: A realistic image of landscape scene depicting a green car parking on the left of a blue
truck, with a red air balloon and a bird in the sky
Objects: [('a green car', [21, 281, 211, 159]), ('a blue truck', [269, 283, 209, 160]), ('a red air
balloon', [66, 8, 145, 135]), ('a bird', [296, 42, 143, 100])]
Background prompt: A realistic landscape scene
Negative prompt: None

Caption: A realistic top-down view of a wooden table with two apples on it
Objects: [('a wooden table', [20, 148, 472, 216]), ('an apple', [150, 226, 100, 100]), ('an apple',
[280, 226, 100, 100])]
Background prompt: A realistic top-down view
Negative prompt: None

Caption: A realistic scene of three skiers standing in a line on the snow near a palm tree
Objects: [('a skier', [5, 152, 139, 168]), ('a skier', [278, 192, 121, 158]), ('a skier', [148, 173,
124, 155]), ('a palm tree', [404, 105, 103, 251])]
Background prompt: A realistic outdoor scene with snow
Negative prompt: None

Caption: An oil painting of a pink dolphin jumping on the left of a steam boat on the sea
Objects: [('a steam boat', [232, 225, 257, 149]), ('a jumping pink dolphin', [21, 249, 189, 123])]
Background prompt: An oil painting of the sea

```

```

1493 Negative prompt: None
1494
1495 Caption: A cute cat and an angry dog without birds
1496 Objects: [('a cute cat', [51, 67, 271, 324]), ('an angry dog', [302, 119, 211, 228])]
1497 Background prompt: A realistic scene
1498 Negative prompt: birds
1499
1500 Caption: Two pandas in a forest without flowers
1501 Objects: [('a panda', [30, 171, 212, 226]), ('a panda', [264, 173, 222, 221])]
1502 Background prompt: A forest
1503 Negative prompt: flowers
1504
1505 Caption: An oil painting of a living room scene without chairs with a painting mounted on the wall, a
1506 cabinet below the painting, and two flower vases on the cabinet
1507 Objects: [('a painting', [88, 85, 335, 203]), ('a cabinet', [57, 308, 404, 201]), ('a flower vase',
1508 [166, 222, 92, 108]), ('a flower vase', [328, 222, 92, 108])]
1509 Background prompt: An oil painting of a living room scene
1510 Negative prompt: chairs
1511
1512 Caption: INSERT_PROMPT_HERE
1513 Objects:

```

## Listing 10. Reprompting with Errors VQA

```

1514 INSERT_IMAGE_PATCH_API
1515 You are provided a Python program that answers a query about an image, with a set of tests with the
1516 corresponding outputs and exected responses.
1517 Correct the Python program such that it passes the tests.
1518 - Ensure the corrected program is different than the incorrect program provided.
1519
1520 Query: Is there a blue chair in the image?
1521 Incorrect Program:
1522 def execute_command(image):
1523     image_patch = ImagePatch(image)
1524     blue_chair = image_patch.find("chair")
1525     if not blue_chair:
1526         return "No"
1527     is_blue = any([chair.verify_property("blue") for chair in blue_chair])
1528     return "Yes" if is_blue else "No"
1529 Error: verify_property() missing 1 required positional argument: 'visual_property'
1530 Corrected Program:
1531 def execute_command(image):
1532     image_patch = ImagePatch(image)
1533     chair_patches = image_patch.find("chair")
1534     if not chair_patches:
1535         return "No" # No chairs found
1536     blue_chair_found = any(chair.verify_property("chair", "blue") for chair in chair_patches)
1537     return "Yes" if blue_chair_found else "No"
1538
1539 Query: "Are there any flowers to the left of the house?"
1540 Incorrect Program:
1541 def execute_command(image):
1542     image_patch = ImagePatch(image)
1543     house_patches = image_patch.find("house")
1544     left_of_house_patch = image_patch.crop_left_of_bbox(
1545         house_patches.left, house_patches.lower, house_patches.right, house_patches.upper
1546     ) # Incorrect attribute access
1547     return "Yes" if left_of_house_patch.exists("flower") else "No"
1548 Error: 'list' object has no attribute 'left'
1549 Corrected Program:
1550 def execute_command(image):
1551     image_patch = ImagePatch(image)
1552     house_patches = image_patch.find("house")
1553     if not house_patches:
1554         return "No house found"
1555     house_patch = house_patches[0]
1556     left_of_house_patch = image_patch.crop_left_of_bbox(
1557         house_patch.left, house_patch.lower, house_patch.right, house_patch.upper
1558     )
1559     flowers_found = left_of_house_patch.find("flower")
1560     return "Yes" if flowers_found else "No"
1561
1562
1563 Query: Who wears a green shirt?
1564 Incorrect Program:
1565 def execute_command(image):
1566     image_patch = ImagePatch(image)
1567     # Incorrectly calling find() with an extra argument, leading to an error
1568     people_patches = image_patch.find("person", "green")

```

```

    if not people_patches:
        return "No one"
    people_wearing_green_shirts = []
    for person_patch in people_patches:
        if person_patch.verify_property("clothing", "shirt") and person_patch.verify_property("color",
            "green"):
            people_wearing_green_shirts.append(person_patch)
    if not people_wearing_green_shirts:
        return "No one"
    wearing_green_shirts = ', '.join([person.simple_query("Who is this?") for person in
        people_wearing_green_shirts])
    return wearing_green_shirts
Error: find() takes 2 positional arguments but 3 were given
Corrected Program:
def execute_command(image):
    image_patch = ImagePatch(image)
    people_patches = image_patch.find("person")
    if not people_patches:
        return "No people found"
    people_wearing_green_shirts = []
    for index, person_patch in enumerate(people_patches):
        if person_patch.verify_property("clothing", "shirt") and person_patch.verify_property("color",
            "green"):
            people_wearing_green_shirts.append(index)
    if not people_wearing_green_shirts:
        return "No one"
    wearing_green_shirts = ', '.join([people_patches[i].simple_query("Who is this?") for i in
        people_wearing_green_shirts])
    return wearing_green_shirts

Query: "Is the blue ball inside the box?"
Incorrect Program:
def execute_command(image):
    image_patch = ImagePatch(image)
    ball_patches = image_patch.find("ball")
    blue_ball = [ball for ball in ball_patches if ball.verify_property("color", "blue")]
    blue_ball_left = blue_ball[0].left
    box_patches = image_patch.find("box")
    box_left = box_patches[0].left # Assuming there's always a box present
    if not box_patches:
        return "No"
    return "Yes"
Error: IndexError: list index out of range
Corrected Program:
def execute_command(image):
    image_patch = ImagePatch(image)
    ball_patches = image_patch.find("ball")
    if not ball_patches:
        return "No" # No ball found
    blue_ball = [ball for ball in ball_patches if ball.verify_property("color", "blue")]
    if not blue_ball:
        return "No" # No blue ball found
    box_patches = image_patch.find("box")
    if not box_patches:
        return "No" # No box found
    blue_ball_patch = blue_ball[0]
    for box_patch in box_patches:
        if (box_patch.left <= blue_ball_patch.left and
            box_patch.right >= blue_ball_patch.right and
            box_patch.upper <= blue_ball_patch.upper and
            box_patch.lower >= blue_ball_patch.lower):
            return "Yes"
    return "No"

Query: "Is the table bigger than the chair?"
Incorrect Program:
def execute_command(image):
    image_patch = ImagePatch(image)
    table_patches = image_patch.find("table")
    chair_patches = image_patch.find("chair")
    if not table_patches or not chair_patches:
        return "No"
    if table_patch.area < chair_patch.area:
        return "Yes"
    return "No"
Error: name 'table_patch' is not defined
Corrected Program:
def execute_command(image):
    image_patch = ImagePatch(image)

```

1569  
 1570  
 1571  
 1572  
 1573  
 1574  
 1575  
 1576  
 1577  
 1578  
 1579  
 1580  
 1581  
 1582  
 1583  
 1584  
 1585  
 1586  
 1587  
 1588  
 1589  
 1590  
 1591  
 1592  
 1593  
 1594  
 1595  
 1596  
 1597  
 1598  
 1599  
 1600  
 1601  
 1602  
 1603  
 1604  
 1605  
 1606  
 1607  
 1608  
 1609  
 1610  
 1611  
 1612  
 1613  
 1614  
 1615  
 1616  
 1617  
 1618  
 1619  
 1620  
 1621  
 1622  
 1623  
 1624  
 1625  
 1626  
 1627  
 1628  
 1629  
 1630  
 1631  
 1632  
 1633  
 1634  
 1635  
 1636  
 1637  
 1638  
 1639  
 1640  
 1641  
 1642  
 1643  
 1644  
 1645  
 1646  
 1647

```

1648 table_patches = image_patch.find("table")
1649 chair_patches = image_patch.find("chair")
1650 if not table_patches or not chair_patches:
1651     return "No"
1652 table_patch = table_patches[0]
1653 chair_patch = chair_patches[0]
1654 if table_patch.area > chair_patch.area:
1655     return "Yes"
1656 return "No"
1657
1658 Query: "What is the color of the largest ball?"
1659 Incorrect Program:
1660 def execute_command(image):
1661     image_patch = ImagePatch(image)
1662     ball_patches = image_patch.find("ball")[0]
1663     ball_patches.sort(key=lambda x: x.area)
1664     largest_ball = ball_patches[-1] # Picks the smallest ball due to incorrect indexing
1665     return largest_ball.simple_query("What is the color?")
1666 Error: 'ImagePatch' object has no attribute 'sort'
1667 Corrected Program:
1668 def execute_command(image):
1669     image_patch = ImagePatch(image)
1670     ball_patches = image_patch.find("ball")
1671     ball_patches.sort(key=lambda x: x.area)
1672     largest_ball = ball_patches[-1]
1673     return largest_ball.simple_query("What is the color?")
1674
1675 Query: INSERT_QUERY_HERE
1676 Incorrect Program:
1677 INSERT_CODE_HERE
1678 Error: INSERT_ERROR_HERE
1679 Corrected Program:

```

Listing 11. Reprompting with Errors ITM

```

1680 INSERT_IMAGE_PATCH_API
1681
1682 You are provided a Python program that answers a query about an image, with a set of tests with the
1683 corresponding outputs and exected responses.
1684 Correct the Python program such that it passes the tests.
1685 - Ensure the corrected program is different than the incorrect program provided.
1686
1687 Query: "Verify image matches text="An airplane is flying in the sky, and birds are flying below it.""
1688 Incorrect Program:
1689 def execute_command(image):
1690     image_patch = ImagePatch(image)
1691     airplane = image_patch.find("airplane")
1692     birds = image_patch.find("birds")
1693     if airplane[0].vertical_center > birds[0].vertical_center:
1694         return "Yes"
1695     return "No"
1696 Error: IndexError: list index out of range
1697 Corrected Program:
1698 def execute_command(image):
1699     image_patch = ImagePatch(image)
1700     airplane_patches = image_patch.find("airplane")
1701     bird_patches = image_patch.find("bird")
1702     if not airplane_patches or not bird_patches:
1703         return "No"
1704     airplane = airplane_patches[0]
1705     birds_below = all(bird.vertical_center > airplane.vertical_center for bird in bird_patches)
1706     return "Yes" if birds_below else "No"
1707
1708 Query: "Verify image matches text="The bird is flying above the tree, and a cat is sitting under the
1709 tree.""
1710 Incorrect Program:
1711 def execute_command(image):
1712     image_patch = ImagePatch(image)
1713     tree = image_patch.find("tree")
1714     bird = image_patch.find("bird")
1715     cat = image_patch.find("cat")
1716     if not tree or not bird or not cat:
1717         return "No"
1718     if bird.vertical_center < tree.vertical_center and cat.vertical_center > tree.vertical_center:
1719         return "Yes"
1720     return "No"
1721 Error: list has no attribute vertical_center
1722 Corrected Program:
1723 def execute_command(image):

```

```

image_patch = ImagePatch(image)
tree_patches = image_patch.find("tree")
bird_patches = image_patch.find("bird")
cat_patches = image_patch.find("cat")
if not tree_patches or not bird_patches or not cat_patches:
    return "No"
tree = tree_patches[0]
bird_above = all(bird.vertical_center < tree.vertical_center for bird in bird_patches)
cat_below = all(cat.vertical_center > tree.vertical_center for cat in cat_patches)
return "Yes" if bird_above and cat_below else "No"

Query: "Verify image matches text='A man is riding a bicycle, and a dog is running beside him.'"
Incorrect Program:
def execute_command(image):
    image_patch = ImagePatch(image)
    man = image_patch.find("man")
    bicycle = image_patch.find("bicycle")
    dog = image_patch.find("dog")
    if not man or not bicycle or not dog:
        return "No"
    if abs(man[0].center_x - dog[0].center_x) < 50:
        return "Yes"
    return "No"
Error: ImagePatch has no attribute center_x
Corrected Program:
def execute_command(image):
    image_patch = ImagePatch(image)
    man_patches = image_patch.find("man")
    bicycle_patches = image_patch.find("bicycle")
    dog_patches = image_patch.find("dog")
    if not man_patches or not bicycle_patches or not dog_patches:
        return "No"
    man = man_patches[0]
    bicycle = bicycle_patches[0]
    dog_beside = any(abs(dog.horizontal_center - man.horizontal_center) < 100 for dog in dog_patches)
    return "Yes" if dog_beside else "No"

Query: "Verify image matches text='A man is holding a red balloon, and a child is reaching up to grab it.'"
Incorrect Program:
def execute_command(image):
    image_patch = ImagePatch(image)
    man = image_patch.find("man")
    balloon = image_patch.find("balloon")
    child = image_patch.find("child")
    if not man or not balloon or not child:
        return "No"
    if balloon[0].verify_property("red") and child[0].vertical_center < balloon[0].vertical_center:
        return "Yes"
    return "No"
Error: verify_property() missing 1 required positional argument: 'visual_property'
Corrected Program:
def execute_command(image):
    image_patch = ImagePatch(image)
    man_patches = image_patch.find("man")
    balloon_patches = image_patch.find("balloon")
    child_patches = image_patch.find("child")
    if not man_patches or not balloon_patches or not child_patches:
        return "No"
    balloon = balloon_patches[0]
    is_red_balloon = balloon.verify_property("balloon", "red")
    child_below_balloon = all(child.vertical_center < balloon.vertical_center for child in child_patches)
    return "Yes" if is_red_balloon and child_below_balloon else "No"

Query: "Verify image matches text='A cat is sitting on the table, and a book is lying beside it.'"
Incorrect Program:
def execute_command(image):
    image_patch = ImagePatch(image)
    cat_patches = image_patch.find("cat")
    book_patches = image_patch.find("book")
    if not cat_patches or not book_patches:
        return "No"
    if abs(cat.horizontal_center - book.horizontal_center) < 50:
        return "Yes"
    return "No"
Error: name 'cat' is not defined
Corrected Program:
def execute_command(image):

```

1724  
1725  
1726  
1727  
1728  
1729  
1730  
1731  
1732  
1733  
1734  
1735  
1736  
1737  
1738  
1739  
1740  
1741  
1742  
1743  
1744  
1745  
1746  
1747  
1748  
1749  
1750  
1751  
1752  
1753  
1754  
1755  
1756  
1757  
1758  
1759  
1760  
1761  
1762  
1763  
1764  
1765  
1766  
1767  
1768  
1769  
1770  
1771  
1772  
1773  
1774  
1775  
1776  
1777  
1778  
1779  
1780  
1781  
1782  
1783  
1784  
1785  
1786  
1787  
1788  
1789  
1790  
1791  
1792  
1793  
1794  
1795  
1796  
1797  
1798  
1799  
1800  
1801  
1802



```

image_patch = ImagePatch(image)
cat_patches = image_patch.find("cat")
book_patches = image_patch.find("book")
table_patches = image_patch.find("table")
if not cat_patches or not book_patches or not table_patches:
    return "No"
cat = cat_patches[0]
book = book_patches[0]
table = table_patches[0]
is_cat_on_table = cat.vertical_center < table.vertical_center and abs(cat.horizontal_center -
    table.horizontal_center) < 50
is_book_beside_cat = abs(book.horizontal_center - cat.horizontal_center) < 50
return "Yes" if is_cat_on_table and is_book_beside_cat else "No"

```

Query: INSERT\_QUERY\_HERE

Incorrect Program:

INSERT\_CODE\_HERE

Error: INSERT\_ERROR\_HERE

## References

- [1] Yash Goyal, Tejas Khot, Douglas Summers-Stay, Dhruv Batra, and Devi Parikh. Making the v in vqa matter: Elevating the role of image understanding in visual question answering. In *Proceedings of the IEEE conference on computer vision and pattern recognition*, pages 6904–6913, 2017. 6
- [2] Cheng-Yu Hsieh, Jieyu Zhang, Zixian Ma, Aniruddha Kembhavi, and Ranjay Krishna. Sugarcreeper: Fixing hackable benchmarks for vision-language compositionality. *Advances in neural information processing systems*, 36, 2024. 1
- [3] Drew A Hudson and Christopher D Manning. Gqa: A new dataset for real-world visual reasoning and compositional question answering. In *Proceedings of the IEEE/CVF conference on computer vision and pattern recognition*, pages 6700–6709, 2019. 1
- [4] Zaid Khan, Vijay Kumar BG, Samuel Schuster, Yun Fu, and Manmohan Chandraker. Self-training large language models for improved visual program synthesis with visual reinforcement. In *Proceedings of the IEEE/CVF Conference on Computer Vision and Pattern Recognition*, pages 14344–14353, 2024. 1, 6
- [5] Junnan Li, Dongxu Li, Silvio Savarese, and Steven Hoi. Blip-2: Bootstrapping language-image pre-training with frozen image encoders and large language models. In *International conference on machine learning*, pages 19730–19742. PMLR, 2023. 1, 6
- [6] Shilong Liu, Zhaoyang Zeng, Tianhe Ren, Feng Li, Hao Zhang, Jie Yang, Chunyuan Li, Jianwei Yang, Hang Su, Jun Zhu, et al. Grounding dino: Marrying dino with grounded pre-training for open-set object detection. In *European Conference on Computer Vision*. Springer, 2024. 1
- [7] Kenneth Marino, Mohammad Rastegari, Ali Farhadi, and Roozbeh Mottaghi. Ok-vqa: A visual question answering benchmark requiring external knowledge. In *Proceedings of the IEEE/cvf conference on computer vision and pattern recognition*, pages 3195–3204, 2019. 6
- [8] Alec Radford, Jong Wook Kim, Chris Hallacy, Aditya Ramesh, Gabriel Goh, Sandhini Agarwal, Girish Sastry, Amanda Askell, Pamela Mishkin, Jack Clark, et al. Learning transferable visual models from natural language supervision. In *International conference on machine learning*, pages 8748–8763. PMLR, 2021. 1, 6
- [9] Ramprasaath R Selvaraju, Purva Tendulkar, Devi Parikh, Eric Horvitz, Marco Tulio Ribeiro, Besmira Nushi, and Ece Kamar. Squinting at vqa models: Introspecting vqa models with sub-questions. In *Proceedings of the IEEE/CVF Conference on Computer Vision and Pattern Recognition*, pages 10003–10011, 2020. 6
- [10] Dídac Surís, Sachit Menon, and Carl Vondrick. Vipergpt: Visual inference via python execution for reasoning. In *Proceedings of the IEEE/CVF International Conference on Computer Vision*, pages 11888–11898, 2023. 1
- [11] Tristan Thrush, Ryan Jiang, Max Bartolo, Amanpreet Singh, Adina Williams, Douwe Kiela, and Candace Ross. Winoground: Probing vision and language models for visio-linguistic compositionality. In *2022 IEEE/CVF Conference on Computer Vision and Pattern Recognition (CVPR)*, pages 5228–5238. IEEE Computer Society, 2022. 1
